# 1 **SOL1 and SOL2 Regulate Fate Transition and Cell Divisions in the Arabidopsis Stomatal Lineage**

2

3 Abigail R. Simmons<sup>1‡</sup>, Kelli A. Davies<sup>1‡</sup>, Wanpeng Wang<sup>2</sup>, Zhongchi Liu<sup>2</sup>, Dominique C. Bergmann<sup>\*1, 3</sup>

4 <sup>1</sup>Department of Biology, Stanford University, Stanford, CA 94305-5020, USA;

5 <sup>2</sup>Department of Cell Biology and Molecular Genetics, University of Maryland, College Park, MD 20742

6 <sup>3</sup>Howard Hughes Medical Institute (HHMI), Stanford University, Stanford, CA 94305-5020, USA

7 <sup>‡</sup>Contributed equally

8 <sup>\*</sup>Corresponding author. Email: [dbergmann@stanford.edu](mailto:dbergmann@stanford.edu) (DCB)

## 9 **Abstract**

10 In the stomatal lineage, cells make fate transitions from asymmetrically dividing and self-renewing  
11 meristemoids, to commitment to the guard mother cell identity, and finally through a single division to create  
12 mature, post-mitotic stomatal guard cells. Flexibility in the stomatal lineage allows plants to alter leaf size  
13 and stomatal density in response to environmental conditions; however, transitions must be clean and  
14 unidirectional in order to produce functional and correctly patterned stomata. Among direct transcriptional  
15 targets of the stomatal initiating factor, SPEECHLESS, we found a pair of genes, *SOL1* and *SOL2*, required  
16 for effective transitions in the lineage. Here we show that these two genes, which are homologues of the  
17 LIN54 DNA-binding components of the mammalian DREAM complex, are expressed in a cell cycle  
18 dependent manner and regulate cell fate and division properties in the self-renewing early lineage. In the  
19 terminal division of the stomatal lineage, however, these two proteins appear to act in opposition to their  
20 closest paralogue, *TSO1*, revealing complexity in the gene family may enable customization of cell  
21 divisions in coordination with development.

22 Keywords: cell cycle, DREAM complex, stomata, cell-state transition, Arabidopsis, CXC-Hinge-CXC

23

## 24 **Introduction:**

25 The development of organized tissues containing multiple cell types requires a careful balance of  
26 proliferation and differentiation processes. One such balancing act is found in the leaves of *Arabidopsis*,  
27 where divisions in the stomatal lineage generate the majority of epidermal cells (Geisler et al., 2000). The  
28 stomatal lineage is characterized by an early proliferative meristemoid phase in which cells divide  
29 asymmetrically in a self-renewing fashion, followed by a transition and commitment to one of two  
30 alternative fates: pavement cell or guard mother cell (GMC). If a cell becomes a GMC, it will divide  
31 symmetrically to form the two guard cells of the stomatal complex, a valve-like structure that facilitates  
32 plant/atmosphere gas exchange (Fig. 1A).

33 Transcriptional regulation of division and differentiation in the stomatal lineage involves a set of

34 closely related and sequentially expressed basic helix loop helix (bHLH) transcription factors,  
35 SPEECHLESS (SPCH), MUTE and FAMA (Fig. 1A) and their more distantly related bHLH heterodimer  
36 partners ICE1/SCREAM and SCRM2. These transcription factors regulate both cell fate and cell division.  
37 For example, in the ultimate product of the stomatal lineage, guard cells, RETINOBLASTOMA RELATED  
38 (RBR) is needed to halt divisions (Borghi et al., 2010) and also forms a complex with FAMA to maintain  
39 mitotic quiescence and keep guard cells in a terminally differentiated state (Lee et al., 2014; Matos et al.,  
40 2014). FAMA also directly represses cell-type specific CYCLIN(CYC) D7;1 to prevent over-division of  
41 guard cells (Weimer et al., 2018). One stage earlier, MUTE is required to repress the previous meristemoid  
42 fate and simultaneously drive cells to adopt GMC fate (Pillitteri et al., 2007). MUTE does so in part by  
43 directly regulating CYCD5;1 and other cell cycle factors to ensure the GMC divides symmetrically to form  
44 the guard cells (Han et al., 2018).

45 The earliest phases of the stomatal lineage are complicated because there are three types of  
46 asymmetric divisions--entry, amplifying and spacing--that occur an indeterminate number of times.  
47 Previous studies have sought to understand how SPCH controls entry into the stomatal lineage and how  
48 SPCH drives these recurrent and varied asymmetric divisions. From these studies, positive and negative  
49 feedback motifs emerged, with SPCH inducing its transcriptional partners ICE1 and SCRM2 to locally  
50 elevate its activity, while also initiating a longer range negative feedback through secreted signaling  
51 peptides to ensure its eventual downregulation (Horst et al., 2015; Lau et al., 2014). Targets that connect  
52 SPCH to core cell cycle behaviors and that allow meristemoids to exit the self-renewing stage and progress  
53 to GMCs, however, remained elusive.

54 Here we characterize the expression pattern and function of *SOL1* and *SOL2*, two genes encoding  
55 proteins containing cysteine rich-repeat (CXC) domains separated by a conserved hinge (CXC-Hinge-CXC,  
56 CHC), in the stomatal lineage. Their expression patterns are not identical, but both genes are enriched in  
57 the stomatal precursors, and protein reporters accumulate in nuclei in a distinct pattern coincident with cell-  
58 cycle progression. We show the *SOL1* and *SOL2*, although initially identified as SPCH target genes, are  
59 required for efficient fate transitions through multiple stomatal lineage stages and in their absence, cell fates  
60 are incorrectly specified. Finally, we consider a potentially antagonistic relationship between these two  
61 genes and their next closest paralogue, *TSO1*, in the final guard-cell generating division of the stomatal  
62 lineage.

63

64

65 **Results:**

66 **SOL1 and SOL2 are stomatal-lineage expressed targets of SPCH**

67 Among the hundreds of genes both bound and upregulated by SPCH, we were particularly drawn  
68 to two genes encoding CHC proteins. Animal CHC proteins LIN54 (*C. elegans*, *H. sapiens*) and MYB  
69 interacting protein (MIP) 120 (*D. melanogaster*) bind DNA in a sequence specific manner and are  
70 components of DREAM (DP, RBR, E2F and Myb-MuvB (Multi-vulval Class B)) complexes. Animal  
71 DREAM complexes are implicated in cell-cycle and transcriptional regulation, chromatin remodeling and  
72 cell differentiation (Sadasivam and DeCaprio, 2013). Arabidopsis encodes eight CHC-domain proteins  
73 ((Andersen et al., 2007); Fig. 1B); of this family, only *TSO1* has been functionally characterized, and *TSO1*  
74 is important for properly regulating divisions in the floral meristem (Song et al., 2000). SPCH directly  
75 targets At3g22760 and At4g14770 (Fig. 1C-D), a closely related pair located in the same branch of the  
76 CHC family as *TSO1*. In the literature, At3g22760 and At4g14770 have been given the names  
77 *SOL1/TCX3* (TCX = TSO1-like CXC, SOL = TSO1-like) and *SOL2/TCX2*, respectively (Andersen  
78 et al., 2007; Liu et al., 1997; Sijacic et al., 2011). We will refer to these genes as *SOL1* and *SOL2*.  
79 *SOL1* and *TSO1* are tandemly arranged in the genome, but *TSO1* does not appear to be a SPCH  
80 target (Fig. 1C-D).

81 To determine the expression pattern of *SOL1* and *SOL2*, we generated transcriptional reporters  
82 containing 2457bp and 2513 kb of 5' sequence, respectively, driving expression of yellow fluorescent  
83 protein (YFP). Both *SOL1* and *SOL2* reporters were expressed in young leaves and were most strongly  
84 expressed in young stomatal lineage cells, consistent with *SOL1* and *SOL2* being targets of SPCH (Fig. 1E-  
85 F). To gain insight into SOL protein behaviors, we generated translational reporters; downstream of the  
86 promoters, we added the genomic fragments of *SOL1* and *SOL2* encompassing exons and introns from the  
87 predicted translational start codon to before the stop codon (2757bp genomic and 3301bp respectively) with  
88 a 3' sequence encoding YFP. Both translational reporters were restricted to nuclei (Fig. 2 and Fig. 3) and  
89 both appeared to be functional as they rescued the *sol1 sol2* mutant phenotypes in the stomatal lineage  
90 (described below and in Fig. 4).

91 *SOL1*-YFP was expressed in the meristemoids and GMCs (Fig. 2A). Compared to the  
92 corresponding transcriptional reporter, *SOL1*-YFP showed a somewhat patchy expression pattern.  
93 Although it was expressed in nuclei of both GMCs and meristemoids, the brightness varied among  
94 populations of these cells (Fig. 2A) and some young stomatal lineage cells did not express it at all (Fig. 2A,  
95 dotted arrow). Given the role of *SOL1* homologues in the cell cycle, we hypothesized that variation in  
96 expression was due to cell-cycle regulated protein abundance. To test this, we performed time-lapse

97 confocal microscopy on SOL1-YFP expressing plants. We included either SPCH-CFP (meristemoid  
98 marker) or MUTE-CFP (GMC marker) and a plasma-membrane marker (RCI2A-mCherry) in the  
99 background to allow us to precisely identify the cells in which SOL1 was expressed.

100 SOL1 was co-expressed with SPCH prior to asymmetric divisions of meristemoids (Fig. 2B,E),  
101 however the SOL1-YFP signal disappears at the division, while SPCH-CFP persists initially in both  
102 daughter cells (Fig. 2C,F), before being retained in only the smaller of the two daughter cells (Fig. 2D,G).  
103 Time-lapse imaging of SOL1-YFP and MUTE-CFP shows a similar pattern. Because SOL1-YFP is  
104 expressed in meristemoids, it initially precedes MUTE expression (Fig. 2H,M) but disappears before the  
105 cell divides (Fig. 2 I,N). In cells transitioning to GMC fate, MUTE-CFP precedes SOL1-YFP expression  
106 (Fig.2 J,O), but eventually the two markers are co-expressed (Fig.2 K,P) and both markers are gone prior  
107 to the symmetric GMC division (Fig.2 L,Q). Altogether, SOL1 is expressed in nuclei of cells at the early  
108 meristemoid stage, the late meristemoid stage and the GMC stage, but it disappears prior to cell divisions,  
109 suggesting that the protein is actively degraded in a cell-cycle dependent manner (see also Fig. S1A-E).

110 SOL2-YFP resembles SOL1-YFP in its co-expression with SPCH-CFP in nuclei of meristemoids  
111 and MUTE-CFP in nuclei of GMCs (Fig. S1F,G). SOL2, however, was often also expressed in the sister  
112 cells of meristemoids (stomatal lineage ground cells, SLGCs) and in pavement cells (Fig. 3A, double  
113 arrows). This expression pattern could emerge from a more broadly expressed promoter, or because SOL2  
114 is under different cell-cycle regulation than SOL1, and simply persists into these cell types after  
115 meristemoid division. Time-lapse imaging of SOL2-YFP revealed that expression disappears prior to  
116 asymmetric meristemoid divisions (Fig. 3B-D) and symmetric GMC divisions (Fig. 3E-G), just like SOL1.  
117 The expanded domain of SOL2 instead appears to be due to expression beginning in pavement cells prior  
118 to their division (Fig. 3H-L), just as it does in meristemoids and GMCs. To further narrow down when in  
119 the cell cycle SOL2 was expressed, we time-lapse imaged plants co-expressing SOL2-YFP and the S-phase  
120 marker HTR2pro:CDT1a(C3)-RFP (Yin et al., 2014). SOL2-YFP was visible on average 3 hours before  
121 the CDT1a-RFP (Fig. S1H-L, quantified in M). SOL2 then disappeared 1-2 hours before appearance of the  
122 new cell plate; timing that is consistent with degradation during the G2-M transition (Fig. S1N). Taken  
123 together, these data suggest that SOL1 and SOL2 could function in the late G1, S, and G2 cell cycle phases  
124 in meristemoids and GMCs.

## 125 **SOL1 and SOL2 are redundantly required for stomatal lineage progression and correct stomatal** 126 **patterning**

127 To explore the function of these proteins in the stomatal lineage, we identified T-DNA insertion  
128 alleles for each and tested their impact on *SOL1* or *SOL2* expression (Fig. S2A). Two alleles for each gene

129 dramatically reduced expression as assayed by qRT-PCR, though none completely abolished it (Fig. S2B).  
130 Double mutants were generated by crossing and genotyping for the relevant mutation by PCR (details in  
131 methods). A typical phenotype for disruptions in stomatal lineage cell fate, signaling or polarity is the  
132 presence of stomata in pairs or clusters in mature cotyledons, so we counted stomatal pairs on 21 days post  
133 germination (dpg) adaxial cotyledons for each single mutant and two double mutant combinations. No  
134 *SOL1* or *SOL2* single mutants had a statistically significant pairing phenotype, but both double mutant  
135 combinations did (Fig. S2C). The strongest pairing phenotype and lowest expression of *SOL1* and *SOL2*  
136 genes was found in the *sol1-4 sol2-2* double mutant, and so we focused on this double mutant for more  
137 detailed phenotypic analysis; unless otherwise mentioned, *sol1 sol2* will refer to this specific allelic  
138 combination.

139 To capture the complexity of divisions and fates in the stomatal lineage, we characterized the *sol1*  
140 *sol2* phenotype at 7 dpg, when SPCH-associated amplifying divisions are occurring, and a late stage (21  
141 dpg) when the (wildtype) epidermis has finished development and contains only mature guard and  
142 pavement cells. At 7 dpg in abaxial cotyledons, the most distinctive *sol1 sol2* phenotype was the increased  
143 number of small cells (here defined as cells less than 200 square micron in area), often found in clusters  
144 (Fig. 4B, white arrows). Wildtype seedlings have some of these small cells (Fig. 4A), however, the number  
145 is significantly increased in *sol1 sol2* double mutants (Fig. 4B-C) and this small cell phenotype can be  
146 rescued by expression of *SOL1* or *SOL2* reporters (Fig. 4C).

147 We next examined the end stage phenotype of the first pair of true leaves at 21 days post  
148 germination (dpg). In wildtype seedlings, the adaxial true leaf epidermis consists mostly of guard cells and  
149 pavement cells (Fig. 4D). In *sol1 sol2* double mutants at this stage, the most prominent phenotype was pairs  
150 of stomata (Fig. 4E, white arrowhead). Resupplying *SOL* activity via translational reporter also rescued this  
151 late stage phenotype (Fig. 4F). We chose to score the adaxial true leaf as representative of an end stage  
152 phenotype, because cells in the abaxial true leaf in *sol1 sol2* mutants were still dividing at 21 dpg, a  
153 phenotype in itself. Both abaxial and adaxial true leaves, however, contained stomatal pairs at this late  
154 stage.

155 We used time-lapse imaging to pinpoint the origin of the early and late stomatal lineage phenotypes  
156 and the connection between them. A key question is whether the accumulation of small cells comes from  
157 aberrant divisions (e.g. divisions of non-stomatal lineage cells, or inappropriately symmetric divisions) or  
158 whether divisions are qualitatively normal, but more frequent. *sol1 sol2* cotyledons marked with plasma  
159 membrane marker ML1pro:RCI2A-mCherry were tracked for 60 hrs (images captured every 60 min,  
160 starting age 3 dpg when the stomatal lineage is initiating), and compared to a time matched series from a

161 wildtype cotyledon. Stomatal lineage progression is asynchronous, and we followed cells from regions  
162 displaying a diversity of mature and precursor cell types.

163 In wildtype, we observed frequent asymmetric divisions of meristemoids (Fig. 4H, yellow and blue  
164 arrows). The asymmetrically dividing meristemoid cells appeared, in the plane of the epidermis, as slightly  
165 lobed squares, and typically divided 1-2 more times in a spiral pattern previously described as “amplifying  
166 divisions” (Geisler et al., 2000; Robinson et al., 2011) (Fig. 4I-J, yellow arrows). Visually symmetric  
167 divisions were also observed in larger cells (Fig. 4I, green arrow).

168 In *sol1 sol2* mutants, we also observed repeated divisions of slightly lobed square cells (Fig. 4K-  
169 N, Fig. S3A-D) and while it was clear that the mutant seedlings had more small cells than wildtype, our  
170 data did not suggest that the small cells resulted from qualitatively aberrant divisions. For example, in Fig.  
171 4K-L, three of the four small cells undergo an asymmetric division, each of which appears normal in terms  
172 of size and orientation. Some of the small cells generated in this manner continued in the lineage, ultimately  
173 dividing symmetrically and forming stomata (Fig. 4N, yellow arrow), but others remained small during the  
174 time course. One of the cells, (Fig. 4K-N, white arrowhead) did not divide in the course of the video and  
175 instead began to form lobes. In other cases, groups of four small cells were observed to arise from additional  
176 divisions of a meristemoid/SLGC pair (e.g. Fig. S3E-G).

177 Since the early asymmetric divisions appeared qualitatively normal, we considered alternative  
178 explanations for the appearance of excess small cells: cells might divide faster or post-division expansion  
179 could be slowed. To evaluate these possibilities, we needed to be able to monitor a cell from its initial  
180 “birth” until its next division, which was challenging due to the typical (>16hr) length of plant cell cycles,  
181 but from the time-lapse movies we were able to quantify 24 such divisions in WT and 22 divisions in *sol1*  
182 *sol2*. We calculated cell cycle length as the time (in hours) between one cell division and the next, and areal  
183 expansion as the traced 2D area of a cell immediately after its first division compared to immediately before  
184 its second division. We found that the cell cycle in *sol1 sol2* double mutants was significantly *slower* than  
185 in wildtype (4.5 hours median difference, Fig. S3H). The percent areal growth per hour however, was also  
186 significantly less (Fig. S3I and methods). Overall leaf size in *sol1 sol2* was not significantly different from  
187 wildtype at 14 dpv (Fig. S3J), consistent with the smaller cell size balancing out the effect of greater cell  
188 numbers observed in the mutants. Failure to expand post division is a hallmark of cell identity defects in  
189 SLGCs and can be seen when SPCH or ICE1 are not correctly degraded in SLGCs (Kanaoka et al., 2008;  
190 Lampard et al., 2008). When SPCH or ICE1 is stabilized, SLGCs maintain the division capacity of their  
191 SPCH-expressing predecessors, leading to the accumulation of excess small cells.

192

193 **SOL1 and SOL2 activity appears to be required at multiple transitions**

194 The late-stage phenotype of stomatal pairs could arise from inappropriate divisions of GCs, or from  
195 earlier defects such as cell identity errors in SLGCs that enable both these cells and their sister cells to act  
196 as guard cell precursors. When we extracted examples of stomatal pair formation from the time-lapse  
197 images, we observed two origins for stomatal pairs. In some cases, two small cells in a group of four  
198 differentiated into GMCs and then divided to form stomata in contact (Fig. 4O-P); showing that the early  
199 stage phenotype can develop directly into the late stage phenotype. However, we also observed two young  
200 guard cells both divide a second time to produce four guard cells (Fig. 4Q-R) suggesting *SOL* activity at  
201 the MUTE stage or later was required. These two defects suggest multiple roles for SOLs in stomatal  
202 transitions and are consistent with the expression of SOLs just prior to the meristemoid division and the  
203 GMC division.

204

205 **MUTE expression is disconnected from cell fate in *sol1 sol2* double mutants**

206 Division behaviors suggested cell identity defects in the stomatal lineage, but to more accurately  
207 characterize these defects, we examined SPCH, MUTE and FAMA translational reporters in *sol1 sol2*  
208 mutants. To capture the very earliest stages of the lineage, we imaged cotyledons at 3 dpg as well as at 7  
209 dpg. SPCH is expressed in small cells in *sol1 sol2* and wildtype at 3 dpg (Fig. 5A and Fig S4A), though  
210 there are more of these small cells in the mutant. At 7 dpg, small cells that have begun to lobe lose SPCH  
211 (Fig. 5B), suggesting that the small cells are likely meristemoids and that SPCH is not obviously mis-  
212 regulated in the absence of *SOL1* and *SOL2*. A similar comparison of MUTE expression at these two  
213 timepoints did reveal a deviation from WT in that the number of cells expressing MUTE did not decrease  
214 over time (Fig. 5C-D). Because elevated MUTE can lead to stomatal hyperproduction (Pillitteri et al.,  
215 2007), we also imaged a transcriptional reporter (MUTE<sub>pro</sub>:CFP<sub>nls</sub>) in addition to MUTE<sub>pro</sub>:MUTE-CFP  
216 to confirm that MUTE persistence was not due to the effect of an additional copy of MUTE (Fig. S4G,H).  
217 FAMA is mostly expressed in recently divided guard cells at 3 and 7 dpg, but is occasionally observed in  
218 rounded small cells that are likely to divide symmetrically (Fig. 5E,F), suggesting that most small cells in  
219 *sol1 sol2* have not entered the later (FAMA) stage of the lineage (wildtype comparisons for all markers in  
220 Fig. S4).

221 The appearance of MUTE expressing cells at both 3 dpg and 7 dpg timepoints made us curious  
222 about whether the MUTE-positive small cells at 3 dpg progress in the lineage to form guard cells, or if they  
223 are stuck at an earlier stage. To determine the fate of MUTE expressing small cells, we performed time-  
224 lapse imaging on a MUTE-CFP reporter in *sol1 sol2* seedlings (3 dpg abaxial cotyledon). In wildtype plants,

225 MUTE expression begins after the final asymmetric division (Fig. 5G) and it disappears prior to the  
226 symmetric division (Fig. 5H, I), thus MUTE expressing cells do not normally divide in wildtype plants.  
227 When we performed time-lapse imaging on *sol1 sol2* lines, however, we found that small cells expressing  
228 MUTE-CFP often divide. Sometimes these divisions are visually symmetric, like GMC divisions; however,  
229 MUTE expression is still detected long after the division (Fig. 5K-M, white arrow). Other divisions  
230 resemble asymmetric meristemoid divisions (Fig. 5L-M white arrowhead, N-P white arrow). Thus, in the  
231 absence of *SOL1* and *SOL2*, MUTE expression is no longer sufficient to reliably predict GMC fate.

232

### 233 ***SOL1* and *SOL2* may oppose activity of paralogue *TSO1* in the stomatal lineage**

234 *SOL1* and *SOL2* are closely related to the CHC-domain protein best characterized in plants,  
235 *TSO1* (Andersen et al., 2007; Sijacic et al., 2011). We did not originally focus on *TSO1* because it is neither  
236 bound nor induced by SPCH (Fig. 1 B,C and Lau et al, 2014), but a recent publication included a *TSO1*  
237 translational reporter (Wang et al., 2018) and we found this reporter to be expressed in a pattern similar to  
238 *SOL2*-YFP. Specifically, *TSO1*-GFP was expressed throughout the epidermis, in meristemoids (Fig. 6A,  
239 arrow), GMCs (Fig. 6A, arrowheads) and pavement cells (Fig. 6A, double arrow), but not guard cells. This  
240 led us to speculate that *TSO1* could be partially redundant with *SOL1* and *SOL2*.

241 The *TSO1* gene is adjacent to *SOL1* (Fig. 1D), which made generating a triple mutant by crossing  
242 infeasible, so we reduced expression levels of *TSO1* in the stomatal lineage by expressing an artificial  
243 miRNA against it with the *TOO MANY MOUTHS* (*TMM*) promoter (Nadeau and Sack, 2002). In the *sol1*  
244 *sol2* background, multiple independent TMMpro:amiRNA-*tso1* lines led to an unexpected new phenotype  
245 in which guard cells failed to divide, and instead formed large round- or kidney- shaped cells. We termed  
246 this phenotype single guard cell, or SGC (Fig. 6D, blue arrowhead), to be consistent with previous literature  
247 describing this phenotype (Boudolf et al., 2004; Xie et al., 2010). The SGC phenotype was not described  
248 in previous reports on *TSO1* (Andersen et al., 2007; Liu et al., 1997), and our own analysis of segregating  
249 populations from two previously described alleles (*tso1* homozygotes are sterile) *tso1-1/sup-5* and  
250 SALK\_074231C, *tso1-6/+* failed to identify the SGC phenotype (no instances in 18 seedlings from *tso1-1/sup-5*  
251 *1/sup-5* plants and 24 seedlings from *tso1-6/+*). We therefore concluded that in the *sol1 sol2* background,  
252 *TSO1* helps ensure the division of the GMC prior to differentiation.

253 We quantified SGC phenotypes in two independent *sol1 sol2; amiRNA-tso1* lines and confirmed  
254 that SGCs were unique to this triple depletion genotype (Fig. 6E). In doing so, we also noticed that *sol1*  
255 *sol2; amiRNA-tso1* had fewer stomatal pairs and that the stomata and pavement cells were visibly larger  
256 than WT or *sol1 sol2* (Fig. 6D). These phenotypes were opposite that of *sol1 sol2* alone; therefore we asked



257 whether depletion of *TSO1* could “rescue” the stomatal pairing and small cell phenotypes associated with  
258 loss of *SOL1* and *SOL2*. When quantified, the *sol1 sol2; amiRNA-tso1* lines had fewer cells per field of  
259 view than *sol1 sol2* plants (Fig. S5A). We normalized the number of stomatal pairs to the number of  
260 pavement cells per field of view and found the number of pairs was still reduced in *amiRNA-tso1 sol1 sol2*  
261 lines compared to *sol1 sol2* mutants (Fig. 6F). The rescue of the *sol1 sol2* pairing phenotype, as well as the  
262 larger pavement cells and guard cells suggested a repression of cell division in the epidermis.

263 The phenotypic effects on stomatal lineage cells suggested that *TSO1* acts in opposition to *SOL1*  
264 and *SOL2*. To test this idea further, we overexpressed *SOL2*, reasoning that more *SOL2* would produce  
265 same SGC phenotype as loss of *TSO1*. We placed *SOL2*-CFP under the control of a strong, estradiol  
266 inducible promoter and induced 3 dpv seedlings bearing the transgene with estradiol for 8 hours, monitored  
267 expression of CFP to confirm overexpression of *SOL2* (Fig. S5B), then returned seedlings to plates to grow  
268 for an additional 5 days. The *SOL2*-overexpressing seedlings produced SGCs (Fig. 6H, blue arrowhead),  
269 whereas the equivalent estradiol treatment on a control line did not (Fig. 6G). The majority of *SOL2*-CFP  
270 expressing seedlings exhibited SGCs on both the adaxial and abaxial surfaces (Fig. S5C). We concluded  
271 that at the GMC stage of stomatal lineage development, three closely related CHC proteins could have  
272 opposite effects on cell cycle progression, with *TSO1* acting as a positive regulator and *SOL2* (and *SOL1*)  
273 as negative regulators.

274

## 275 **Discussion:**

276 As a key regulator of the stomatal lineage, *SPCH* activates and represses thousands of genes to start  
277 the proliferative meristemoid phase of the lineage. Logically, *SPCH* must also set in place a program that  
278 will allow cells to exit this proliferative stage. *SPCH* directly activates many of its own negative regulators,  
279 including *BASL*, *EPF2* and *TMM*, suggesting the existence of feedback loops that modulate *SPCH* levels  
280 (Horst et al., 2015; Lau et al., 2014). Here we have shown that *SOL1* and *SOL2* are stomatal lineage  
281 expressed *SPCH* transcriptional targets and that they encode proteins with a distinctive cycling expression  
282 pattern (Fig. 7A). Normally when cells stop expressing *SPCH* they either begin expressing *MUTE* and  
283 transition to GMC fate, or they become SLGCs and differentiate into pavement cells. Our data suggest that  
284 *SOL1* and *SOL2* aid *SPCH*-expressing meristemoids in their timely transitions to either of these later fates.  
285 For example, time-lapse imaging of cell fate reporters in *sol1 sol2* mutants revealed that *MUTE*-expressing  
286 cells could still have the division behaviors associated with *SPCH*-expressing cells, whereas other *SPCH*-  
287 expressing cells fail to differentiate morphologically into pavement cells even after they downregulate  
288 *SPCH*. How might *SOL1* and *SOL2* aid in transitions? One possibility is that, as DNA-binding domain

289 containing proteins, they regulate expression of *SPCH*. In support of this idea, a genome-wide analysis of  
290 Arabidopsis transcription factor binding found SOL1 and SOL2 associated with sequences immediately  
291 upstream of *SPCH* (O'Malley et al., 2016). Alternatively, SOLs might repress meristemoid identity genes  
292 downstream of *SPCH* when that phase ends.

293 Our analysis of the expression pattern and mutant phenotype also revealed roles of SOL1 and SOL2  
294 at post-*SPCH* stages of stomatal development. Interestingly, a recent study found that both genes are  
295 upregulated in response to MUTE induction (log2 fold changes of 1.60 and 0.83 respectively) (Han et al.,  
296 2018). Whether these genes are direct MUTE targets is not known, but the appearance of SOL1 in GMCs  
297 shortly following MUTE expression (Fig. 2J-K) is consistent with it being a MUTE target. The broader  
298 expression pattern of *SOL2* suggests it is likely dependent on other inputs, consistent with the weaker  
299 induction of *SOL2* relative to *SOL1* in both *SPCH* and MUTE induction experiments (Han et al., 2018; Lau  
300 et al., 2014). The inappropriate expression of MUTE in small cells may suggest that SOL1 and SOL2  
301 downregulate MUTE in a negative feedback loop; however, neither SOL1 nor SOL2 was found to bind  
302 upstream of *MUTE* in large-scale assays of transcription factors (O'Malley et al., 2016). Alternatively, as  
303 downstream targets of MUTE, SOL1 and SOL2 could be coordinating divisions with fate transitions (Fig.  
304 7B). In this model, MUTE is expressed in the small cells at the correct time, but in the absence of SOL1  
305 and SOL2, these cells fail to transition to GMCs and continue to undergo meristemoid-like divisions.

306 *SOL1*, *SOL2* and their paralogue *TSO1*, which is not a direct target of *SPCH*, but is nonetheless  
307 expressed in the epidermis, are then involved in the next fate transition from GMC to guard cell. In wildtype,  
308 this transition is tied to the symmetric division of the GMC into two guard cells. In *sol1 sol2* mutants,  
309 ectopic GMC-like divisions of young guard cells can result in stomatal pairs. Overexpression of *SOL2* or  
310 knockdown of *TSO1* in the *sol1 sol2* background leads to the opposite phenotype in which GMCs fail to  
311 divide, suggesting oppositional roles of SOL1/2 and TSO1 at the GMC division (diagrammed in Fig. 7B).  
312 Cell fate is intrinsically tied to cell division; therefore, it is not always possible to cleanly separate the two.  
313 For example, loss of FAMA expression leads to immature guard cells that recapitulate GMC divisions  
314 (Ohashi-Ito and Bergmann, 2006). If SOL1 and SOL2 promote differentiation, then in their absence young  
315 guard cells retain GMC fate long enough to divide a second time. In the absence of *tsol1 sol1* and *sol2*,  
316 GMCs differentiate and lose the ability to divide too quickly, resulting in SGCs. However, these proteins  
317 might also directly alter the cell cycle (Fig. 7C).

318 We cannot ignore the distinct cell cycle expression pattern of the SOLs, especially in light of the  
319 cell cycle regulatory role that animal CHC domain containing proteins play. In animals, which typically  
320 encode a single somatic CHC domain-containing protein, the CHC protein is found in two types of DREAM  
321 complexes: the quiescent DREAM complex whose role is to repress gene expression in G<sub>0</sub> and the MYB-

322 containing “permissive” DREAM complex found in actively proliferating cells (Beall et al., 2004; Beall et  
323 al., 2007). DREAM also regulates gene expression and epigenetic marks outside of the cell cycle, for  
324 example it regulates the expression of olfactory receptors in fly neurons via histone methylation (Sim et al.,  
325 2012).

326 CHC proteins in plants could potentially be activators or repressors of the cell cycle, and function  
327 in both MYB and DREAM dependent and independent ways. We suggest that SOL1 and SOL2 would have  
328 a cell cycle repressive role based on the observations that (1) *sol1 sol2* mutants have leaves with more cells  
329 (2) *sol1 sol2* mutants display inappropriate divisions of MUTE-expressing cells and (3) SOL1 and SOL2  
330 proteins disappear prior to cell division. In contrast, *TSO1* mutants, originally identified by reproductive  
331 development defects, have cytokinesis defects, shorter root apical meristems and are sterile (Andersen et  
332 al., 2007; Hauser et al., 2000; Liu et al., 1997; Sijacic et al., 2011), which suggest that TSO1 promotes  
333 divisions, though fasciation of the floral meristem in *tsol1* indicates *TSO1* may restrain divisions in some  
334 contexts. *Arabidopsis* encodes many proteins with MYB domains, including FOUR LIPS (FLP) and its  
335 closest paralogue MYB88, which have been connected to GMC divisions (Lai et al., 2005). The *Arabidopsis*  
336 MYBs most likely to be involved in a DREAM complex, however, are five three-repeat-MYB proteins  
337 (MYB3R1-5) more structurally similar to the animal MYBs than FLP and MYB88 (Stracke et al., 2001).  
338 Recent work has linked TSO1 to activity of MYB3R1 a MYB with both cell cycle activating and repressive  
339 roles (Araki et al., 2004; Ito et al., 2001; Kobayashi et al., 2015). Mutations in *MYB3R1* suppress the *tsol1*-  
340 *I* phenotype and TSO1 physically interacts with MYB3R1 (Wang et al. 2018). Moreover, SGC phenotypes  
341 have been reported in *myb3r1 myb3r4* double mutants (Haga et al., 2007); although it is not known whether  
342 the SGC phenotypes in these mutant backgrounds all arise from defects in the same stage of the cell cycle.

343 These discoveries, along with evidence of other physical interactions between DREAM complex  
344 homologues (for example, SOL1 appeared as a partner of repressive MYB3R3 in a proteomics-based  
345 analysis (Kobayashi et al. 2015)), has led to the hypothesis that CHC proteins function in a plant version of  
346 the DREAM complex (reviewed in Magyar and Ito, 2016). How might we imagine a DREAM complex  
347 acts in the stomatal lineage? Perhaps our most unexpected finding was that SOL1 and SOL2 expression  
348 patterns overlap their homologue TSO1 in the epidermis, but phenotypes associated with their loss or  
349 overexpression are opposite. This is a novel situation for DREAM complexes as there are only single CHC  
350 and MYB proteins available for the animal somatic complexes. The function of MYB3R1 as both activator  
351 and repressor of cell cycle progression adds another layer of complexity. Phosphorylation state may  
352 contribute to its dual function (Araki et al., 2004; Chen et al., 2017; Wang et al., 2018), however, binding  
353 partners could also play a role.

354           An earlier model postulated that TSO1 interacts with MYB3R1 to drive M-phase gene activation  
355 (Fig. 7C)(Kobayashi et al., 2015; Wang et al., 2018). Given that SOL1 can interact with the repressive  
356 MYB3R3, we can imagine several additions to that core model. SOL1 and SOL2 might interact with  
357 repressive MYBs to limit the expression of M-phase genes, but their disappearance from dividing cells 1-2  
358 hours before the appearance of the new cell plate, could be part of a G2-M switch mechanism, in which  
359 proteolytic degradation of SOL1/2 leads to incorporation of TSO1 and the activator MYBs into a plant  
360 DREAM complex. An alternative hypothesis is that SOL1, SOL2 and TSO1 can all interact with both types  
361 of MYB3Rs. In this model, MYB3R1 switches from a repressor to an activator when SOL1 and SOL2 are  
362 degraded at G2-M and instead it binds to TSO1. When SOL2 is overexpressed, it sequesters the MYB3R1  
363 protein in the repressor complex, recapitulating the *sol1 sol2 amiR-tso1* phenotype and the *myb3r1 myb3r4*  
364 phenotype. Similarly, in *sol1 sol2*, only the MYB3R1-TSO1 activating complex is present leading to  
365 inappropriate divisions. Finding the precise molecular mechanism for the diverse CHC family roles in cell  
366 behaviors will be an intriguing but challenging future goal, as it will require quantitative assays of  
367 differential incorporation of CHCs into functional complexes, coupled to measurements of gene expression  
368 in response to different complexes in the relevant cell types.

369           Key regulators of three separate stomatal cell states have been known for many years; here we add  
370 an important feature to the developmental trajectory: CHC-domain proteins to enforce transitions between  
371 these fates and to regulate their associated cell cycle behaviors. New technologies enabling measures of  
372 transcriptomes and chromatin accessibility in individual cells have reinvigorated the idea of “transitional  
373 states”, and while there are computational methods to identify where and when these states occur (Farrell  
374 et al., 2018; Xiao et al., 2018) how they are resolved will require experimental analysis of regulators like  
375 the SOLs. We focused on the stomatal lineage, and found multiple fate transitions are regulated by the same  
376 factors, leading to the interesting possibility that CHC proteins and the DREAM complex will be used  
377 repeatedly for cell fate transitions in other tissue, organs and stages of plant development.

378

379

## 380 **MATERIALS AND METHODS:**

### 381 **Plant material and growth conditions**

382 *Arabidopsis thaliana* Columbia (Col-0) was used as wild type in all experiments. Seedlings were grown on  
383 half-strength Murashige and Skoog (MS) medium (Caisson Labs) at 22°C in an ARR66 Percival Chamber  
384 under 16 h-light/8 h-dark cycles and were examined at the indicated times. The following previously  
385 described mutants and reporter lines were used in this study: SPCHpro:SPCH-CFP and MUTEpro:MUTE-  
386 YFP (Davies and Bergmann, 2014); FAMAprYFPnls (Ohashi-Ito and Bergmann, 2006);  
387 HTR2pro:CDT1a(C3)-RFP (Yin et al., 2014); TSO1pro:TSO1-GFP (Wang et al., 2018); *tsol-5*  
388 (Salk\_102956)(Andersen et al., 2007), *hdg2-2*(SALK\_127828C) and *hdg2-4*(SALK\_120064)(Peterson et  
389 al., 2013). The following lines were obtained from the ABRC stock center: *sol1-3*(SAIL\_742\_H03), *sol1-*  
390 *4* (WiscDsLoxHs033\_03E), *sol2-2* (SALK\_021952), *sol2-3* (SALK\_031643). The HDG2proHDG2-GFP  
391 construct (Peterson et al., 2013) was a kind gift from Prof. Keiko Torii (University of Washington)

### 392 **Vector construction and plant transformation**

393 Constructs were generated using the Gateway system (Invitrogen). Appropriate genome sequences (PCR  
394 amplified from Col-0 or from entry clones) were cloned into Gateway-compatible entry vectors, typically  
395 pENTR/D-TOPO (Life Technologies), while promoter sequences were cloned into pENTR-5'TOPO (Life  
396 Technologies) to facilitate subsequent cloning into plant binary vectors pHGY (Kubo et al., 2005) or  
397 R4pGWB destination vector system (Nakagawa et al., 2008).

398 Transcriptional reporters for *SOL1* and *SOL2* were generated by cloning a 5' regulatory region spanning  
399 2500bp or to the 3' end of the upstream gene or (whichever was shorter) to the ATG translational start site  
400 into pENTR5' and recombining with pENTR YFP into R4pGWB540 (Nakagawa et al., 2008). For the  
401 *SOL1* and *SOL2* translational fusions, the genomic fragments corresponding to *SOL1* and *SOL2* (excluding  
402 stop codon) were amplified by PCR then cloned in pENTR D/TOPO (Life Technologies) LR Clonase II  
403 was then used to recombine the resulting pENTR clone and pENTR 5' promoters (*SOL1p*, *SOL2p*) into  
404 R4pGWB540. For the estradiol inducible lines, the UBQ10 promoter was amplified by PCR and subcloned  
405 into pJET, then digested out using AscI XhoI double digest and ligated into p1R4:ML-XVE (Siligato et al.,  
406 2016). P1R4:UBQ10-XVE was recombined with *SOL2* pENTR and R4pGWB443 (Nakagawa et al., 2008).  
407 The TSO1 amiRNA was generated as described previously (Sijacic et al., 2011).

408 Transgenic plants were generated by *Agrobacterium*-mediated transformation (Clough, 2005), and  
409 transgenic seedlings were selected by growth on half-strength MS plates supplemented with 50 mg/l  
410 Hygromycin (pHGY-, p35HGY-, pGWB1-, pGWB540-based constructs), 100 mg/l Kanamycin  
411 (pGWB440 based constructs) or 12 mg/l Basta (pGWB640-based constructs). Primer sequences used for  
412 entry clones are provided in Table S1.

### 413 **Estradiol induction:**

414 3 dpg seedlings grown on agar-solidified half strength MS media were flooded with 10 uM estradiol (Fluka  
415 Chemicals) or a vehicle control. At 8 hrs post induction, liquid was removed, and plates were allowed to  
416 dry, before being returned to incubator for 5 more days. Tissue was collected at 8 dpg and cleared in 7:1  
417 Ethanol:Acetic acid.

### 418 **Confocal and differential interference contrast microscopy**

419 For confocal microscopy, images were taken with a Leica SP5 microscope and processed in ImageJ. Cell  
420 outlines were visualized by 0.1 mg/ml propidium iodide in water (Molecular Probes). Seedlings were  
421 incubated for 10 min in the staining solution and then rinsed once in H<sub>2</sub>O. For differential interference  
422 contrast (DIC) microscopy, samples were cleared in 7:1 ethanol:acetic acid, treated for 30 min with 1N  
423 potassium hydroxide, rinsed in water and mounted in Hoyer's medium. DIC images were obtained on a  
424 Leica DM2500.

#### 425 **Statistical Analysis**

426 Image J was used to count clustering events within a defined field of view. Statistical analysis was  
427 completed in Graphpad Prism. For clustering and cell counts, data were generally not normally distributed  
428 (based on D'Agostino-Pearson test) so analysis was completed with default settings for nonparametric tests.  
429 The Mann-Whitney test was used, where indicated, to compare two sets of data; to compare multiple groups  
430 against one another, the Kruskal-Wallis test, followed by Dunn's multiple comparison test was used where  
431 indicated in figure legends.

#### 432 **RT-qPCR analysis**

433 RNA was extracted from 9 dpw whole seedlings (*sol1-3*, *sol1-4*, *sol2-2*, *sol2-3* and *sol1-4 sol2-2* double  
434 mutants, and WT controls) using the RNeasy Plant Mini Kit (Qiagen) with on-column DNase digestion.  
435 cDNA was synthesized with iSCRIPT cDNA Synthesis Kit (BioRAD), followed by amplification with the  
436 SsoAdvanced<sup>TM</sup> SYBR® Green Supermix (Bio-Rad) using gene specific primers on a CFX96 Real-Time  
437 PCR detection system (Bio-Rad). Reaction conditions: Data were normalized to *ACTIN2* gene controls  
438 using the  $\Delta\Delta^{CT}$  method. Three biological replicates were assayed per genotype. Primers are listed in Table  
439 S1.

#### 440 **Time-lapse imaging:**

441 After growth on half strength MS media, seedlings were transferred to a sterilized perfusion chamber at  
442 indicated days post germination for imaging on a Leica SP5 Confocal microscope following protocols  
443 described previously (Davies and Bergmann, 2014). The chamber was perfused with ¼ strength .75% (w/v)  
444 sucrose (or glucose) liquid MS growth media (pH 5.8) at a rate of 2mL/hr. Z-stacks through the epidermis  
445 were captured with Leica software every 30 or every 60 minutes over 12-60 hour periods and then processed  
446 with Fiji/ImageJ (NIH). Areal growth calculated by determining the 2D area immediately after one division  
447 (Area1) and immediately prior to the next division of the same cell (Area2) using ImageJ.

$$448 \quad \text{Percent Areal Growth Rate} = \frac{\text{Area2} - \text{Area1}}{\text{Area1}} \times \frac{1}{\text{hours}} \times 100\%$$

449

#### 450 **Acknowledgements**

451 We thank lab members Nathan Cho for constructing the SOL2-YFP, CDT1a-RFP line, Yan Gong and Dr.  
452 Heather Cartwright (Carnegie) for imaging advice, and Dr. Annika Weimer and Dr. Camila Lopez-Anido  
453 for detailed feedback on the manuscript.

#### 454 **Competing interests**

455 The authors declare no competing or financial interests

456 **Author contributions**

457 Conceptualization: A.R.S, K.A.D, D.C.B.; Methodology: ARS, KAD Formal analysis: ARS, KAD;  
458 Investigation: ARS, KAD; Resources: W.W. Z.L. Writing - original draft: A.R.S, K.A.D, D.C.B; Writing  
459 - review & editing: A.R.S, W.W. Z.L. K.A.D, D.C.B; Visualization: A.R.S, K.A.D; Supervision: D.C.B.;  
460 Project administration: D.C.B.; Funding acquisition: D.C.B.

461

462 **Funding**

463 A.R.S. was supported by the Donald Kennedy Fellowship and NIH graduate training grant  
464 NIH5T32GM007276 to Stanford University, K.A.D. was an NSF Graduate research fellow, D.C.B. is an  
465 investigator of the Howard Hughes Medical Institute.

466

467 **REFERENCES:**

- 468 Andersen, S.U., Algreen-Petersen, R.G., Hoedl, M., Jurkiewicz, A., Cvitanich, C., Braunschweig, U.,  
469 Schausser, L., Oh, S.A., Twell, D., Jensen, E.O., 2007. The conserved cysteine-rich domain of a  
470 tesmin/TSO1-like protein binds zinc in vitro and TSO1 is required for both male and female fertility in  
471 *Arabidopsis thaliana*. *J Exp Bot* 58, 3657-3670.
- 472 Araki, S., Ito, M., Soyano, T., Nishihama, R., Machida, Y., 2004. Mitotic cyclins stimulate the activity of  
473 c-Myb-like factors for transactivation of G2/M phase-specific genes in tobacco. *J Biol Chem* 279, 32979-  
474 32988.
- 475 Beall, E.L., Bell, M., Georgette, D., Botchan, M.R., 2004. Dm-myb mutant lethality in *Drosophila* is  
476 dependent upon mip130: positive and negative regulation of DNA replication. *Genes Dev* 18, 1667-1680.
- 477 Beall, E.L., Lewis, P.W., Bell, M., Rocha, M., Jones, D.L., Botchan, M.R., 2007. Discovery of tMAC: a  
478 *Drosophila* testis-specific meiotic arrest complex paralogous to Myb-Muv B. *Genes Dev* 21, 904-919.
- 479 Borghi, L., Gutzat, R., Futterer, J., Laizet, Y., Hennig, L., Gruissem, W., 2010. *Arabidopsis*  
480 RETINOBLASTOMA-RELATED is required for stem cell maintenance, cell differentiation, and lateral  
481 organ production. *Plant Cell* 22, 1792-1811.
- 482 Boudolf, V., Barroco, R., Engler Jde, A., Verkest, A., Beeckman, T., Naudts, M., Inze, D., De Veylder, L.,  
483 2004. B1-type cyclin-dependent kinases are essential for the formation of stomatal complexes in  
484 *Arabidopsis thaliana*. *Plant Cell* 16, 945-955.
- 485 Chen, P., Takatsuka, H., Takahashi, N., Kurata, R., Fukao, Y., Kobayashi, K., Ito, M., Umeda, M., 2017.  
486 *Arabidopsis* R1R2R3-Myb proteins are essential for inhibiting cell division in response to DNA damage.  
487 *Nat Commun* 8, 635.
- 488 Clough, S.J., 2005. Floral dip: agrobacterium-mediated germ line transformation. *Methods Mol Biol* 286,  
489 91-102.
- 490 Davies, K.A., Bergmann, D.C., 2014. Functional specialization of stomatal bHLHs through modification  
491 of DNA-binding and phosphoregulation potential. *Proc Natl Acad Sci U S A* 111, 15585-15590.
- 492 Farrell, J.A., Wang, Y., Riesenfeld, S.J., Shekhar, K., Regev, A., Schier, A.F., 2018. Single-cell  
493 reconstruction of developmental trajectories during zebrafish embryogenesis. *Science* 360.
- 494 Geisler, M., Nadeau, J.A., Sack, F., 2000. Oriented Asymmetric Divisions That Generate the Stomatal  
495 Spacing Pattern in *Arabidopsis* Are Disrupted by the too many mouths Mutation. *The Plant Cell Online* 12,  
496 2075-2086.
- 497 Haga, N., Kato, K., Murase, M., Araki, S., Kubo, M., Demura, T., Suzuki, K., Muller, I., Voss, U., Jurgens,  
498 G., Ito, M., 2007. R1R2R3-Myb proteins positively regulate cytokinesis through activation of KNOLLE  
499 transcription in *Arabidopsis thaliana*. *Development* 134, 1101-1110.
- 500 Han, S.-K., Qi, X., Sugihara, K., Dang, J., Endo, T.A., Miller, K., Kim, E.-D., Miura, T., Torii, K., 2018.  
501 MUTE Directly Orchestrates Cell State Switch and the Single Symmetric Division to Create Stomata.
- 502 Hauser, B.A., He, J.Q., Park, S.O., Gasser, C.S., 2000. TSO1 is a novel protein that modulates cytokinesis  
503 and cell expansion in *Arabidopsis*. *Development* 127, 2219-2226.
- 504 Horst, R.J., Fujita, H., Lee, J.S., Rychel, A.L., Garrick, J.M., Kawaguchi, M., Peterson, K.M., Torii, K.U.,  
505 2015. Molecular Framework of a Regulatory Circuit Initiating Two-Dimensional Spatial Patterning of  
506 Stomatal Lineage. *PLoS Genet* 11, e1005374.
- 507 Ito, M., Araki, S., Matsunaga, S., Itoh, T., Nishihama, R., Machida, Y., Doonan, J.H., Watanabe, A., 2001.  
508 G2/M-phase-specific transcription during the plant cell cycle is mediated by c-Myb-like transcription  
509 factors. *Plant Cell* 13, 1891-1905.
- 510 Kanaoka, M.M., Pillitteri, L.J., Fujii, H., Yoshida, Y., Bogenschutz, N.L., Takabayashi, J., Zhu, J.K., Torii,  
511 K.U., 2008. SCREAM/ICE1 and SCREAM2 specify three cell-state transitional steps leading to *arabidopsis*  
512 stomatal differentiation. *Plant Cell* 20, 1775-1785.
- 513 Kobayashi, K., Suzuki, T., Iwata, E., Nakamichi, N., Suzuki, T., Chen, P., Ohtani, M., Ishida, T., Hosoya,  
514 H., Muller, S., Leviczky, T., Pettko-Szandtner, A., Darula, Z., Iwamoto, A., Nomoto, M., Tada, Y.,  
515 Higashiyama, T., Demura, T., Doonan, J.H., Hauser, M.T., Sugimoto, K., Umeda, M., Magyar, Z., Bogre,



516 L., Ito, M., 2015. Transcriptional repression by MYB3R proteins regulates plant organ growth. *EMBO J*  
517 34, 1992-2007.

518 Kubo, M., Udagawa, M., Nishikubo, N., Horiguchi, G., Yamaguchi, M., Ito, J., Mimura, T., Fukuda, H.,  
519 Demura, T., 2005. Transcription switches for protoxylem and metaxylem vessel formation. *Genes Dev* 19,  
520 1855-1860.

521 Lai, L.B., Nadeau, J.A., Lucas, J., Lee, E.K., Nakagawa, T., Zhao, L., Geisler, M., Sack, F.D., 2005. The  
522 Arabidopsis R2R3 MYB proteins FOUR LIPS and MYB88 restrict divisions late in the stomatal cell  
523 lineage. *Plant Cell* 17, 2754-2767.

524 Lampard, G.R., MacAlister, C.A., Bergmann, D.C., 2008. Arabidopsis Stomatal Initiation Is Controlled by  
525 MAPK-Mediated Regulation of the bHLH SPEECHLESS. *Science* 322, 1113-1116.

526 Lau, O.S., Davies, K.A., Chang, J., Adrian, J., Rowe, M.H., Ballenger, C.E., Bergmann, D.C., 2014. Direct  
527 roles of SPEECHLESS in the specification of stomatal self-renewing cells. *Science* 345, 1605-1609.

528 Liu, Z., Running, M.P., Meyerowitz, E.M., 1997. TSO1 functions in cell division during Arabidopsis flower  
529 development.

530 Nadeau, J.A., Sack, F.D., 2002. Control of stomatal distribution on the Arabidopsis leaf surface. *Science*  
531 296, 1697-1700.

532 Nakagawa, T., Nakamura, S., Tanaka, K., Kawamukai, M., Suzuki, T., Nakamura, K., Kimura, T., Ishiguro,  
533 S., 2008. Development of R4 gateway binary vectors (R4pGWB) enabling high-throughput promoter  
534 swapping for plant research. *Biosci Biotechnol Biochem* 72, 624-629.

535 O'Malley, R.C., Huang, S.C., Song, L., Lewsey, M.G., Bartlett, A., Nery, J.R., Galli, M., Gallavotti, A.,  
536 Ecker, J.R., 2016. Cistrome and Epicistrome Features Shape the Regulatory DNA Landscape. *Cell* 165,  
537 1280-1292.

538 Ohashi-Ito, K., Bergmann, D.C., 2006. Arabidopsis FAMA controls the final proliferation/differentiation  
539 switch during stomatal development. *Plant Cell* 18, 2493-2505.

540 Peterson, K.M., Shyu, C., Burr, C.A., Horst, R.J., Kanaoka, M.M., Omae, M., Sato, Y., Torii, K.U., 2013.  
541 Arabidopsis homeodomain-leucine zipper IV proteins promote stomatal development and ectopically  
542 induce stomata beyond the epidermis. *Development* 140, 1924-1935.

543 Pillitteri, L.J., Sloan, D.B., Bogenschutz, N.L., Torii, K.U., 2007. Termination of asymmetric cell division  
544 and differentiation of stomata. *Nature* 445, 501-505.

545 Robinson, S., Barbier de Reuille, P., Chan, J., Bergmann, D., Prusinkiewicz, P., Coen, E., 2011. Generation  
546 of spatial patterns through cell polarity switching. *Science* 333, 1436-1440.

547 Sadasivam, S., DeCaprio, J.A., 2013. The DREAM complex: master coordinator of cell cycle-dependent  
548 gene expression. *Nat Rev Cancer* 13, 585-595.

549 Sijacic, P., Wang, W., Liu, Z., 2011. Recessive antimorphic alleles overcome functionally redundant loci  
550 to reveal TSO1 function in Arabidopsis flowers and meristems. *PLoS Genet* 7, e1002352.

551 Siligato, R., Wang, X., Yadav, S.R., Lehesranta, S., Ma, G., Ursache, R., Sevillem, I., Zhang, J., Gorte, M.,  
552 Prasad, K., Wrzaczek, M., Heidstra, R., Murphy, A., Scheres, B., Mahonen, A.P., 2016. MultiSite Gateway-  
553 Compatible Cell Type-Specific Gene-Inducible System for Plants. *Plant Physiol* 170, 627-641.

554 Sim, C.K., Perry, S., Tharadra, S.K., Lipsick, J.S., Ray, A., 2012. Epigenetic regulation of olfactory receptor  
555 gene expression by the Myb-MuvB/dREAM complex. *Genes Dev* 26, 2483-2498.

556 Song, J.Y., Leung, T., Ehler, L.K., Wang, C., Liu, Z., 2000. Regulation of meristem organization and cell  
557 division by TSO1, an Arabidopsis gene with cysteine-rich repeats. *Development* 127, 2207-2217.

558 Stracke, R., Werber, M., Weisshaar, B., 2001. The R2R3-MYB gene family in Arabidopsis thaliana. *Curr*  
559 *Opin Plant Biol* 4, 447-456.

560 Wang, W., Sijacic, P., Xu, P., Lian, H., Liu, Z., 2018. Arabidopsis TSO1 and MYB3R1 form a regulatory  
561 module to coordinate cell proliferation with differentiation in shoot and root. *Proc Natl Acad Sci U S A*  
562 115, E3045-E3054.

563 Weimer, A.K., Matos, J.L., Sharma, N., Patell, F., Murray, J.A.H., Dewitte, W., Bergmann, D.C., 2018.  
564 Lineage- and stage-specific expressed CYCD7;1 coordinates the single symmetric division that creates  
565 stomatal guard cells. *Development* 145.

566 Xiao, Y., Hill, M.C., Zhang, M., Martin, T.J., Morikawa, Y., Wang, S., Moise, A.R., Wythe, J.D., Martin,  
567 J.F., 2018. Hippo Signaling Plays an Essential Role in Cell State Transitions during Cardiac Fibroblast  
568 Development. *Dev Cell* 45, 153-169 e156.  
569 Xie, Z., Lee, E., Lucas, J.R., Morohashi, K., Li, D., Murray, J.A., Sack, F.D., Grotewold, E., 2010.  
570 Regulation of cell proliferation in the stomatal lineage by the Arabidopsis MYB FOUR LIPS via direct  
571 targeting of core cell cycle genes. *Plant Cell* 22, 2306-2321.  
572 Yin, K., Ueda, M., Takagi, H., Kajihara, T., Sugamata Aki, S., Nobusawa, T., Umeda-Hara, C., Umeda,  
573 M., 2014. A dual-color marker system for in vivo visualization of cell cycle progression in Arabidopsis.  
574 *Plant J* 80, 541-552.

575

576

577 **FIGURE LEGENDS**

578 **Figure 1: SPCH targets *SOL1* and *SOL2* are expressed in the stomatal lineage**

579 (A) Schematic of stomatal development; each stage color-coordinated with the bHLH transcription factor  
580 that regulates it: SPCH (SPEECHLESS) in meristemoid (M) phase, MUTE in guard mother cell (GMC)  
581 phase, and FAMA in the guard cell (GC) differentiation phase. (B) Phylogenetic tree of CHC proteins in  
582 Arabidopsis, with subjects of this paper shaded, produced with Clustal Omega. (C) Evidence that *SOL1*  
583 and *SOL2* transcripts increase in response to estradiol induction of SPCH; fold change over estradiol  
584 induced wildtype control (Lau et al. 2014). (D) SPCH ChIP-seq reveals promoters of *SOL1* and *SOL2* are  
585 bound by SPCH; y-axis represents enrichment value (CSAR), the output score from MACS2, in arbitrary  
586 units from (Lau et al. 2014). (E-F) Confocal images of *SOL1* and *SOL2* transcriptional reporters (green)  
587 in 3 dpg abaxial cotyledon, indicating they are expressed in meristemoids (M), guard mother cells  
588 (GMCs) and young guard cells (GC). Cell outlines (purple) visualized by staining with propidium iodide.  
589 50 µm scale bars.

590

591 **Figure 2: *SOL1* is co-expressed with SPCH and MUTE prior to asymmetric and symmetric**  
592 **divisions**

593 (A) A functional *SOL1*-YFP reporter is expressed in some (white arrow), but not all (dashed arrow)  
594 meristemoids and GMCs (arrowhead) in 3 dpg abaxial cotyledons (full genotype: *SOL1p:SOL1-YFP*;  
595 *sol1 sol2*); cell outlines visualized with propidium iodide (purple); scale bar 50 µm. (B-Q) Time-lapse  
596 confocal images, cell outlines (purple) visualized with ML1pro:RCI2A-mCherry in wildtype background,  
597 time in hour:minutes noted in top right of each image, scale bars 10 µm. (B-G) Time-lapse of  
598 *SOL1pro:SOL1-YFP* (yellow, B-D) and *SPCHpro:SPCH-CFP* (blue, E-G). (H-Q) Time-lapse of  
599 *SOL1pro:SOL1-YFP* (yellow, H-L) and *MUTEpro:MUTE-CFP* (blue, M-Q). Arrows follow a single cell  
600 through an asymmetric division (I and N), conversion to round GMC (K and P) and a symmetric division  
601 generating paired guard cells (L and Q).

602

603 **Figure 3: *SOL2* is expressed in meristemoids, GMCs and pavement cells in a cell cycle dependent**  
604 **manner**

605 (A) A functional *SOL2*-YFP reporter is expressed in meristemoids (arrow), GMCs (arrowhead) and  
606 SLGCs (double arrow) in 3 dpg abaxial cotyledon (full genotype: *SOL2p:SOL2-YFP*; *sol1 sol2*). Cell  
607 outlines stained with propidium iodide (purple); scale bar 50 µm. (B-L) Time-lapse images of  
608 *SOL1pro:SOL1-YFP* (yellow) with cell outlines marked by ML1pro:RCI12A-mCherry (purple) time in  
609 hour:minutes noted in top right of each image. Arrows indicate new cell divisions. (B-D) meristemoid  
610 divides asymmetrically. (E-G) GMC divides symmetrically. (H-L) Pavement cells divide. In each  
611 division *SOL2* expression disappears 1-2 hours before cell division. Scale bars 50 µm.

612

613 **Figure 4: *SOL1* and *SOL2* are redundantly required for control of early and late stomatal cell**  
614 **division behaviors**

615 (A) Confocal images of 7 dpg WT abaxial cotyledon containing few small cells (indicated by white  
616 arrows) in comparison to (B) *sol1 sol2* double mutants. (C) Quantification of small cell phenotype, n =  
617 16-22. (D-E) DIC images of 21 dpg adaxial true leaf in WT (D) and *sol1 sol2* (E); stomatal pairs

618 indicated with arrowhead. **(F)** Quantification of pairs and higher order stomatal clusters,  $n = 5-10$ .  
619 (A,B,D,E) 50  $\mu\text{m}$  scalebars. **(G-R)** Time-lapse confocal imaging; cell outlines visualized with  
620 ML1pro:RCI2A-mCherry. **(G-J)** Cell proliferation in WT, divisions marked with yellow, blue and green  
621 arrows. **(K-N)** Small cell divisions in *sol1 sol2*, cell divisions marked with yellow arrow. One small cell  
622 (white arrowhead) begins to lobe. **(O-P)** Two neighboring small cells both divide into stomata. **(Q-R)**  
623 Two guard cells each divide symmetrically again. (O, Q) 30  $\mu\text{m}$  scale bars. Significance indicated: \*  
624  $p < 0.05$ , \*\* $p < 0.01$ , \*\*\* $p < 0.001$ , \*\*\*\* $p < 0.0001$ . Dunn's multiple comparison test.

625

### 626 **Figure 5: Markers of cell fate are inappropriately expressed in *sol1 sol2* mutants**

627 **(A-F)** Confocal images of abaxial cotyledons from *sol1 sol2* mutants, at indicated days post germination,  
628 with cell fate reporters SPCHpro:SPCH-YFP (A-B), MUTEpro:MUTE-CFP (C-D) and  
629 FAMApr:YFPnls (E-F). Cell outlines (purple) visualized with propidium iodide. All images same scale,  
630 scale bar 50  $\mu\text{m}$ . **(G-J)** Selections from time-lapse of ML1pro:RCI2A-mCherry and MUTEpro:MUTE-  
631 CFP marker in WT, 10  $\mu\text{m}$  scale bar where MUTE expressing GMC divides symmetrically. (K-M, N-P)  
632 selections from time-lapse of *sol1 sol2* mutant expressing ML1pro:RCI2A-mCherry and  
633 MUTEpro:MUTE-CFP markers, all images same scale, 30  $\mu\text{m}$  scale bar in N. **(K-M)** Two MUTE  
634 expressing cells (indicated by solid white arrow and arrowhead) divide. **(N-P)** MUTE expressing cell  
635 (indicated by solid white arrow) divides asymmetrically.

636

### 637 **Figure 6: Depletion of *TSO1* in *sol1 sol2* background or overexpression of *SOL2* result in similar** 638 **guard cell division defect**

639 **(A)** Confocal image of TSO1pro:TSO1-GFP reporter expressed throughout epidermis, in meristemoids  
640 (arrow), GMCs (arrowhead) and pavement cells (double arrow). **(B-D)** DIC images of 21 dpv adaxial true  
641 leaves (B) WT, (C) Stomatal clustering (white arrowhead) in *sol1 sol2*, (D) stomatal pairs (arrowhead)  
642 and single guard cells (SGCs, blue arrowhead) in *amiR-tso1 sol1 sol2*. **(E)** Quantification of number of  
643 SGCs per field of view. **(F)** Quantified pairs of stomata per pavement cell in field of view. 50  $\mu\text{m}$  scale  
644 bars,  $n = 19-31$ . **(G-H)** DIC images showing production of SGCs upon *SOL2*-YFP overexpression.  
645 Significance indicated: \*  $p < 0.05$ , \*\*  $p < 0.01$ , \*\*\*  $p < 0.001$ , \*\*\*\*  $p < 0.0001$ , Dunn's multiple comparison  
646 test.

647

### 648 **Figure 7: A model of *SOL* function in stomatal fate transitions and cell divisions**

649 **(A)** In meristemoids, SPCH binds to and induces *SOL1* and *SOL2*, and their protein products regulate the  
650 M→GMC transition and may downregulate *SPCH* in a negative feedback loop. In GMCs, MUTE induces  
651 *SOL1* and *SOL2* to regulate the GMC→GC transition and limit cell divisions. At this stage, *SOL1* and  
652 *SOL2* oppose *TSO1*. **(B)** In *sol1 sol2* mutants, meristemoids fail to progress to SLGC or GMC identity in  
653 a timely manner, although they may eventually become stomata (sometimes forming pairs) or pavement  
654 cells. Therefore, stomatal pairs arise from two different defects in fate transition – 1 early and 1 late. In  
655 the absence of *tso1* GMCs fail to divide forming single guard cells (SGC). **(C)** *SOL1* and *SOL2* repress  
656 divisions, possibly by repressing M-phase genes in S and G2. In M-phase, *SOL1* and *SOL2* disappear and  
657 *TSO1* is able to upregulate M-phase genes through its binding partner, MYB3R1.

658

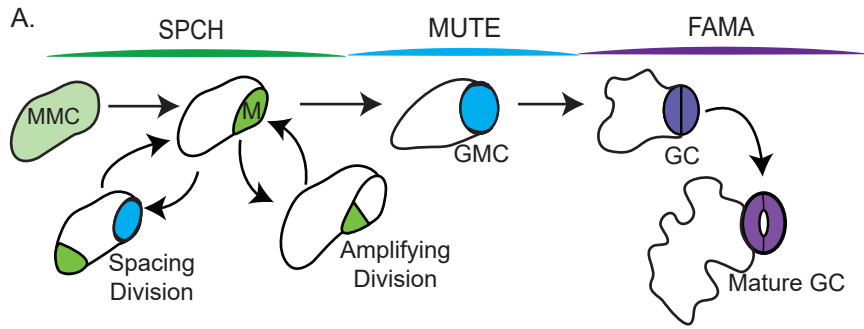

### CRC Proteins in Arabidopsis

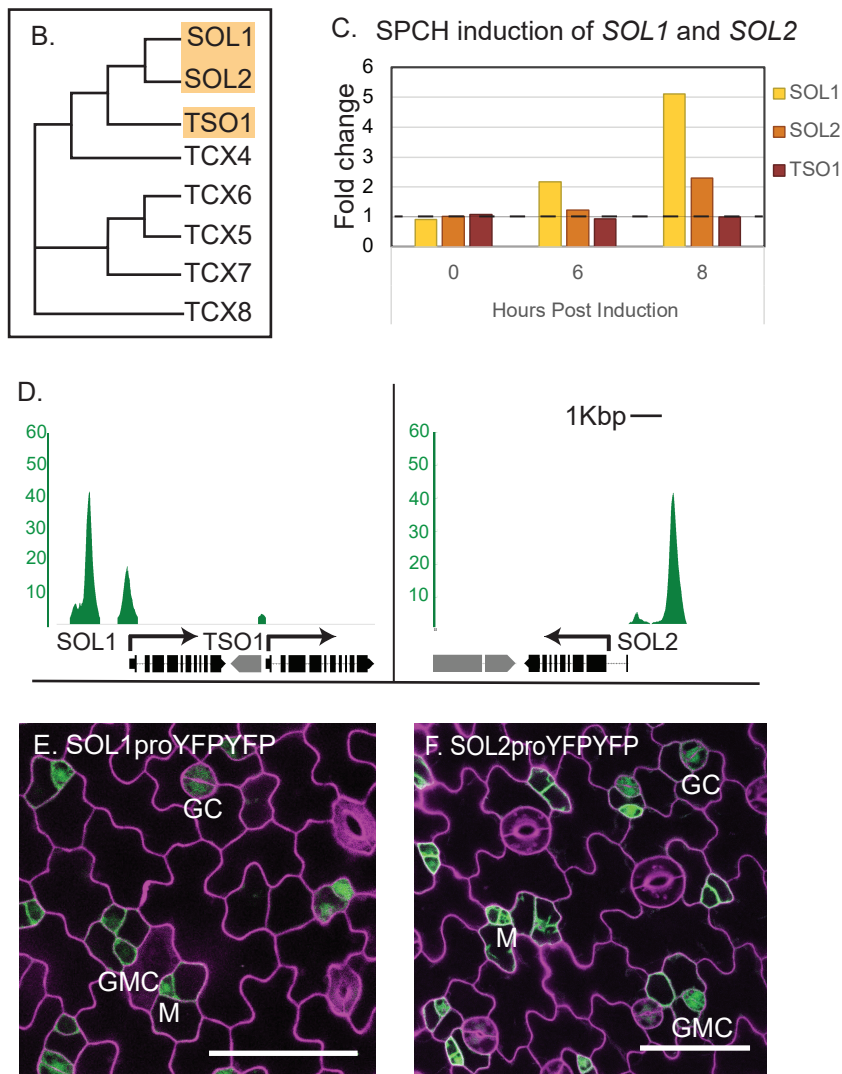

**Figure 1: SPCH targets *SOL1* and *SOL2* are expressed in the stomatal lineage**

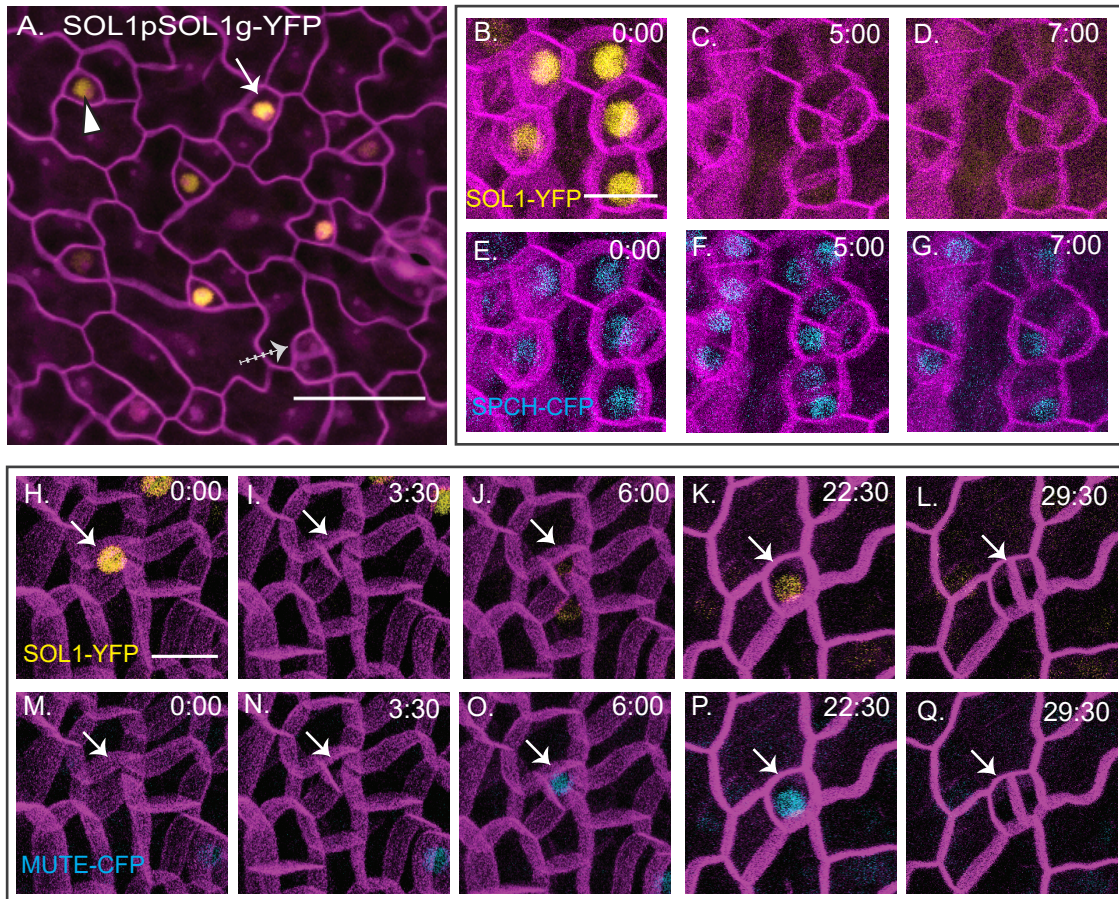

**Figure 2: SOL1 is co-expressed with SPCH and MUTE prior to asymmetric and symmetric divisions**

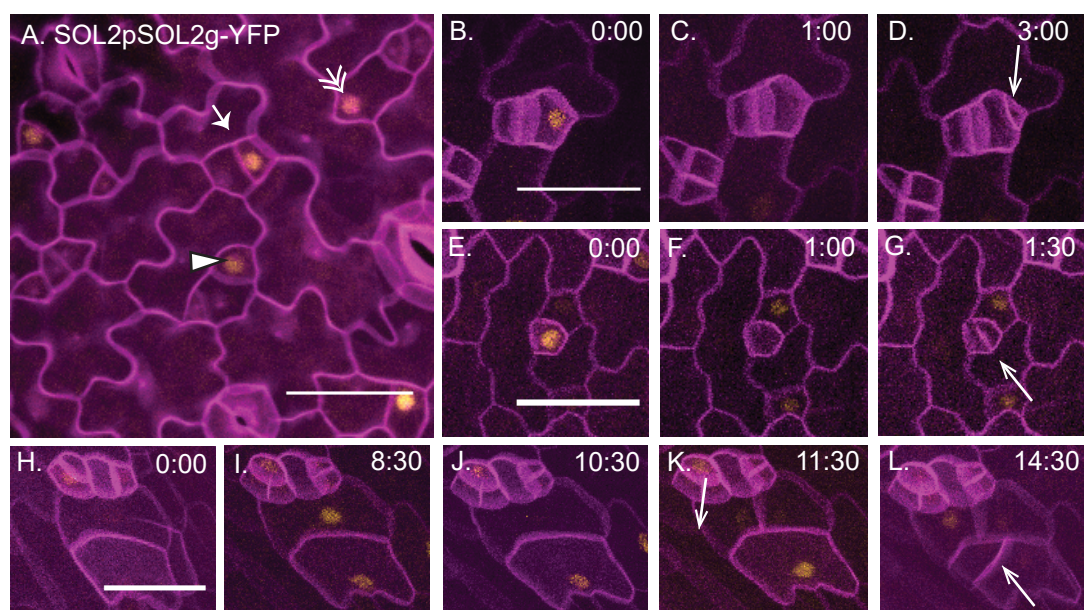

**Figure 3: SOL2 is expressed in meristemoids, GMCs and pavement cells in cell cycle dependent manner**

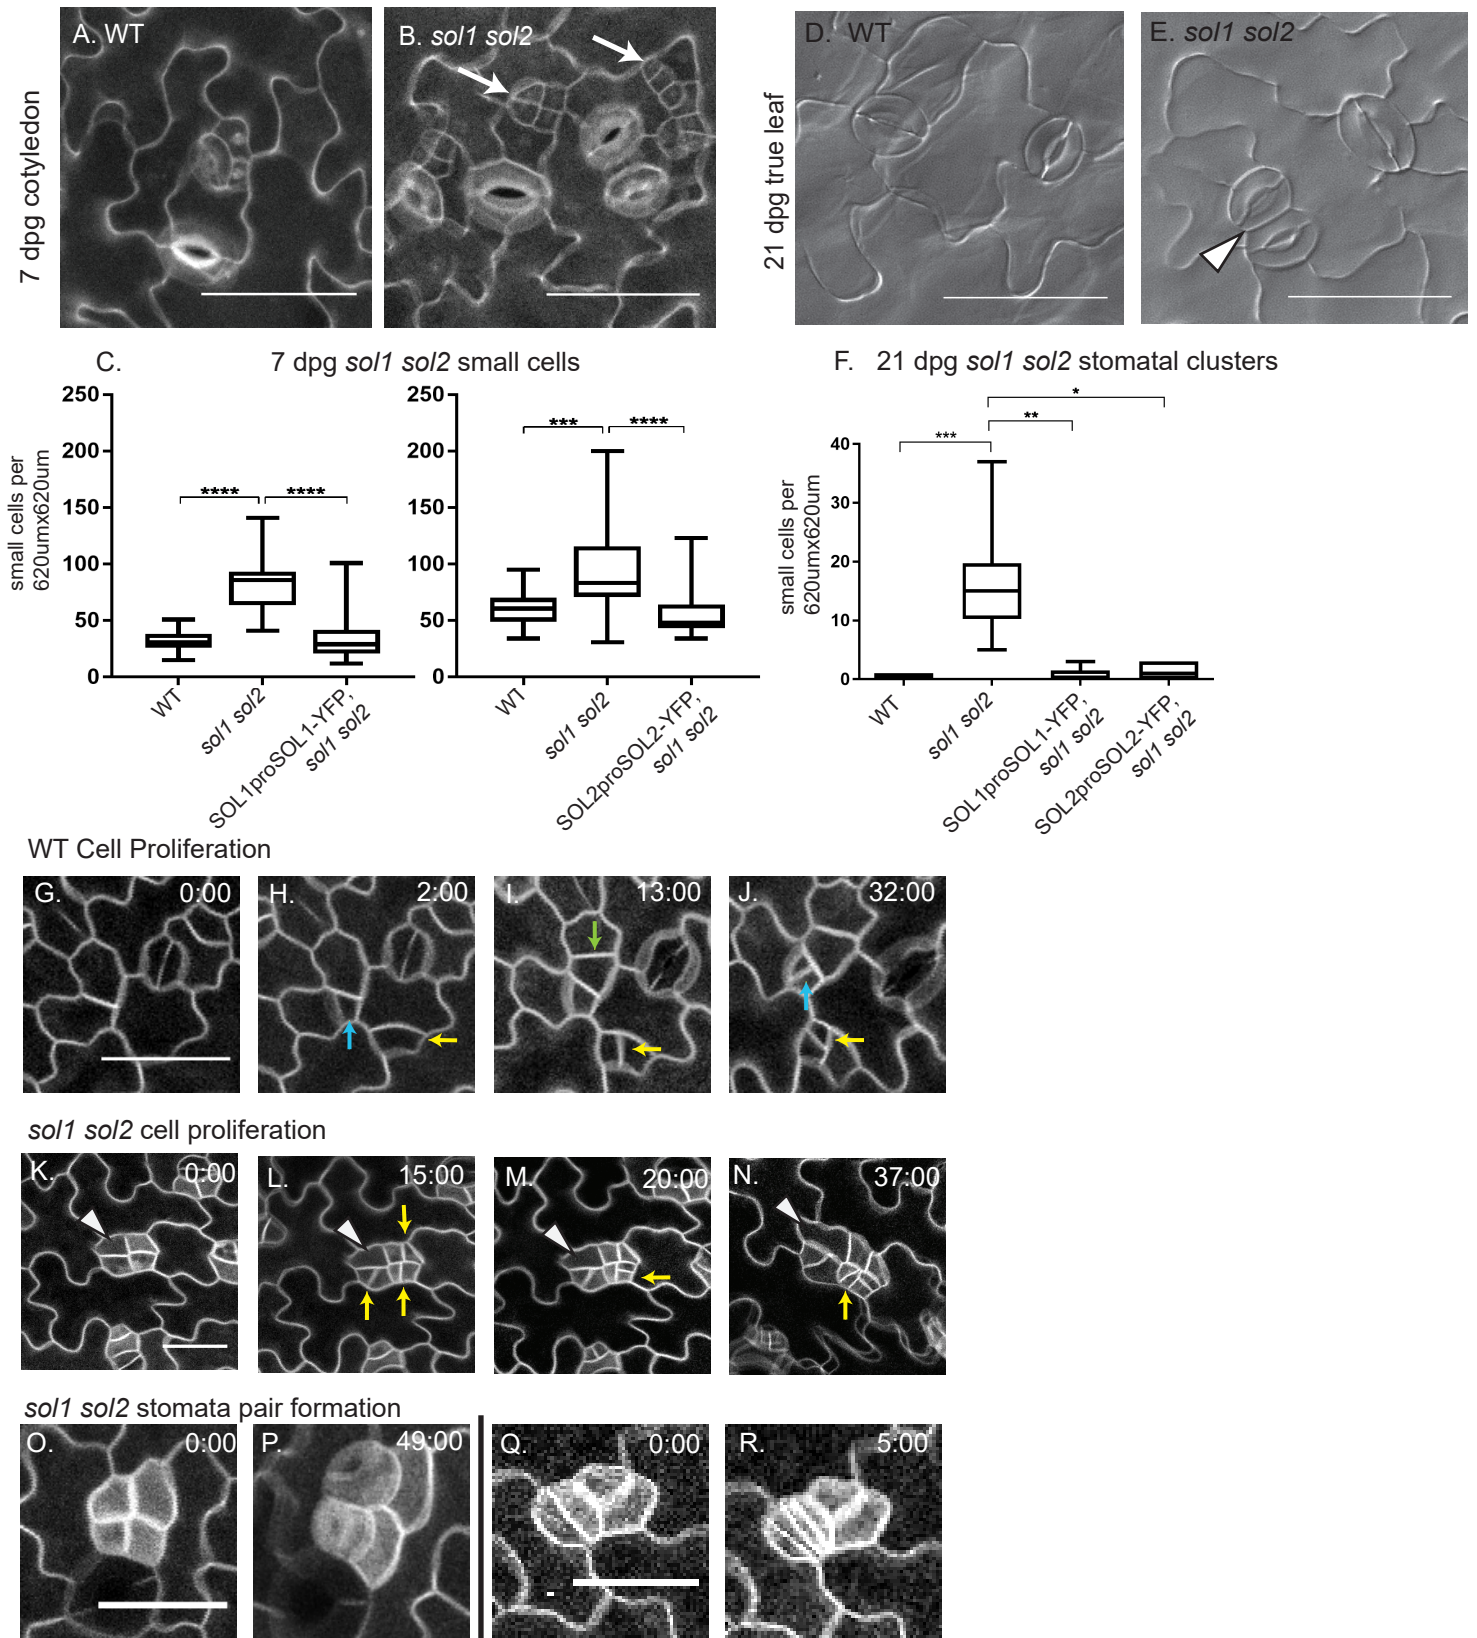

**Figure 4: SOL1 and SOL2 are redundantly required for control of early and late stomatal cell division behaviors**



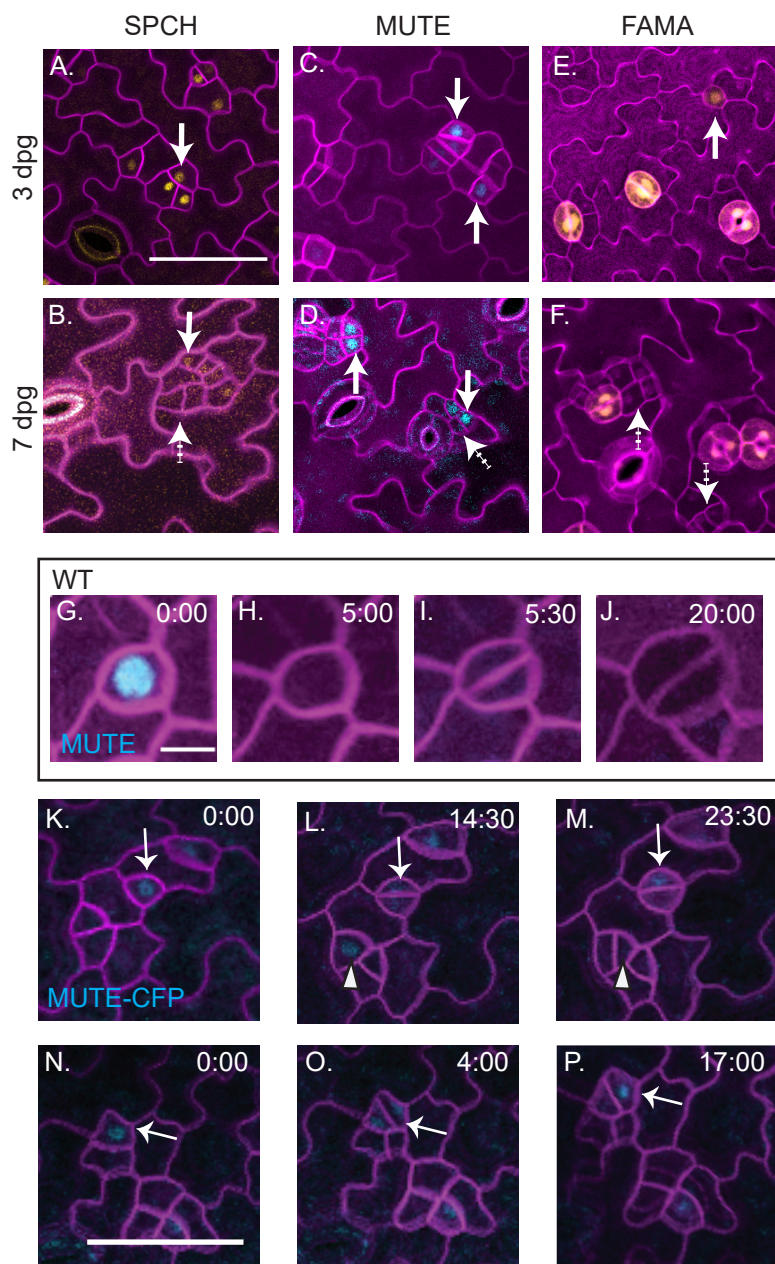

**Figure 5: Markers of cell fate are inappropriately expressed in *sol1 sol2* mutants**

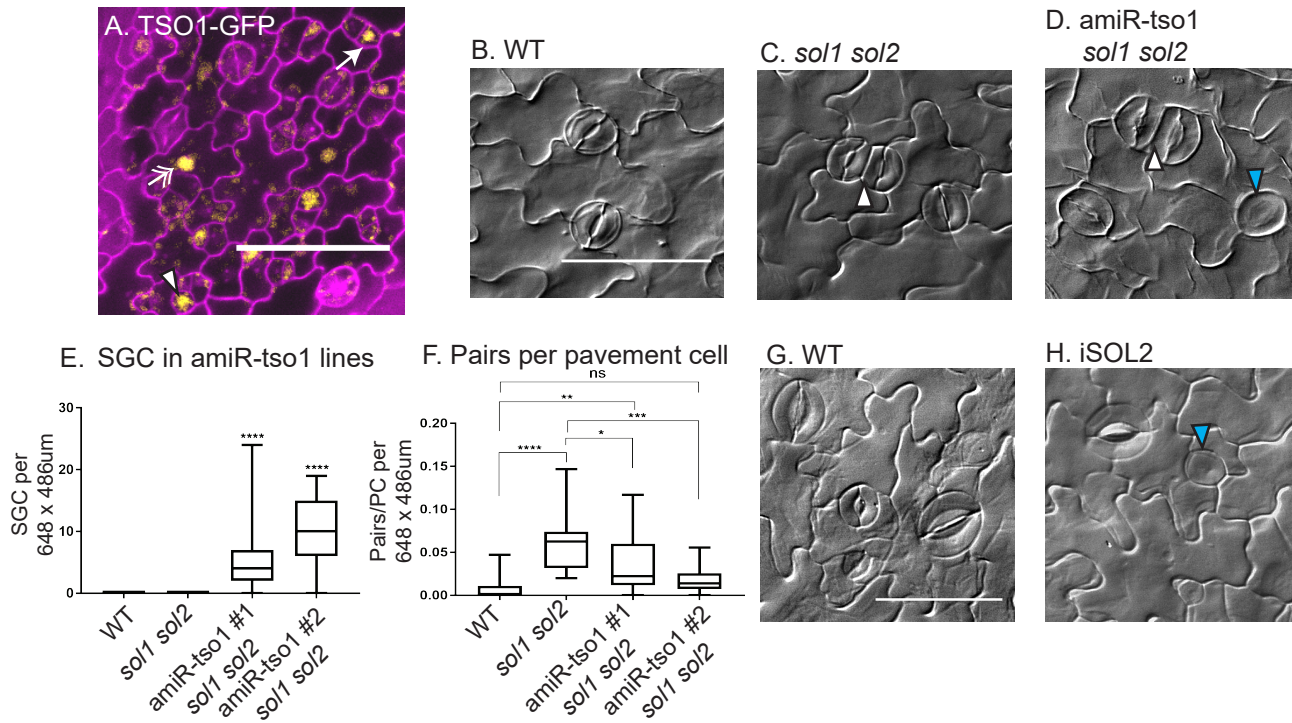

**Figure 6: Depletion of TSO1 in *sol1 sol2* background and overexpression of SOL2-CFP reveals opposite activities of paralogues in GMC divisions**

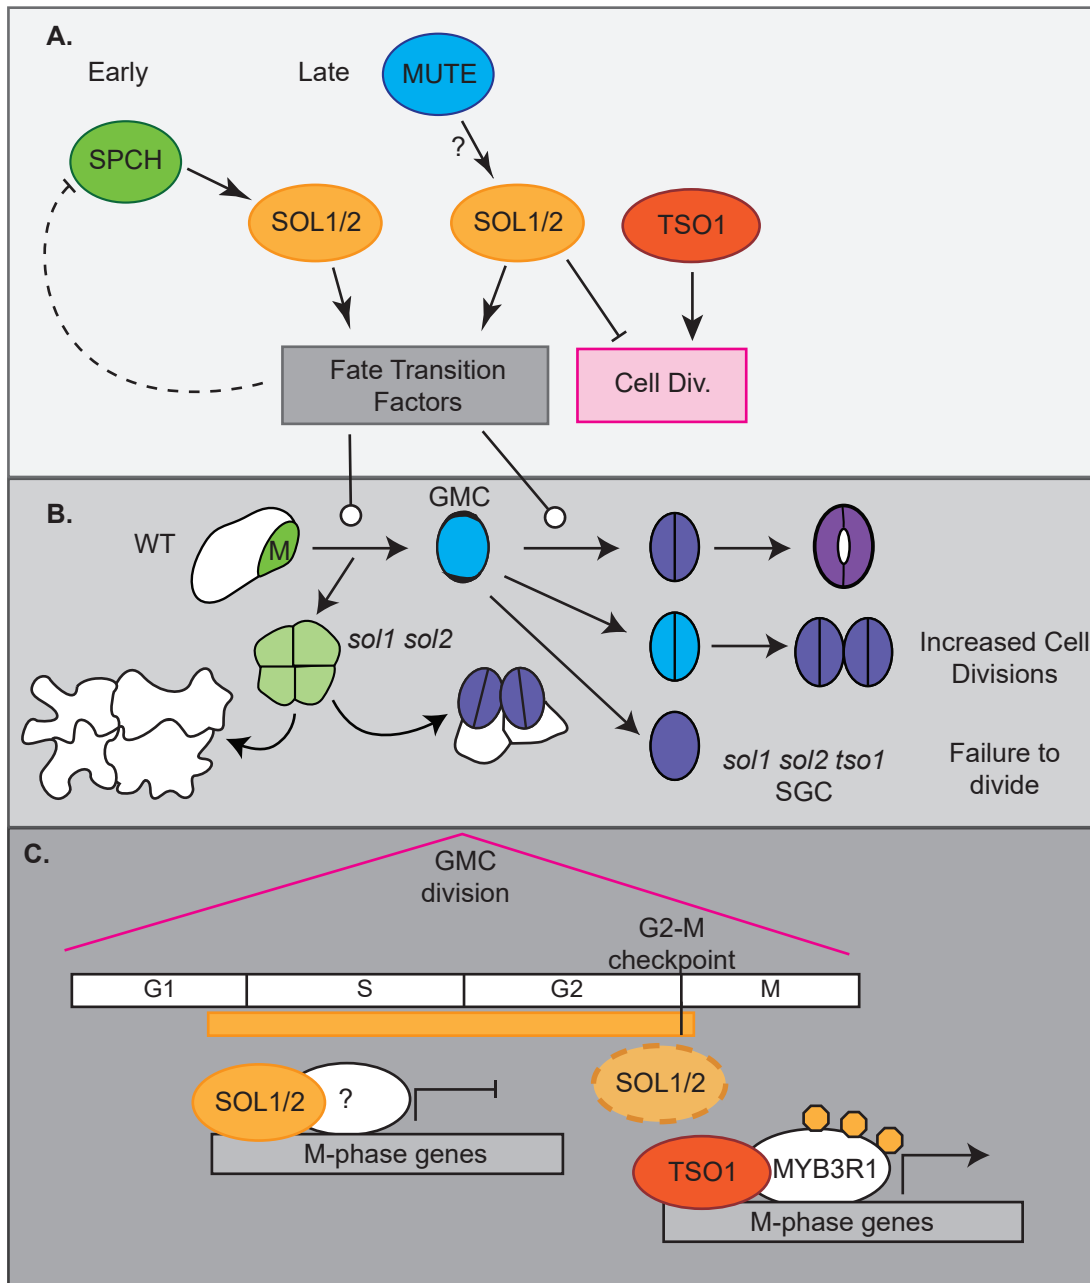

**Figure 7: A model of SOL function in fate transitions and cell divisions**

659 **SUPPLEMENTARY INFORMATION**

660 Figure S1: Additional analysis of SOL1 and SOL2 expression patterns emphasizing cell cycle expression

661 Figure S2: Supporting information about alleles used for phenotypic analysis

662 Figure S3: Evidence that cell cycle times are increased, and post-division cell growth reduced in the  
663 stomatal lineage of *sol1 sol2* plants

664 Figure S4: Additional marker in *sol1 sol2* double mutants and marker expression in wildtype seedlings.

665 Figure S5: Quantification of effects of *tso-1* amiRNA and SOL2-CFP overexpression on cell size and  
666 division phenotypes

667 Table S1: Primers used in this study

668

### SOL1-YFP

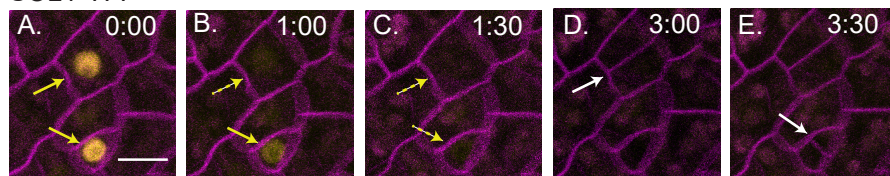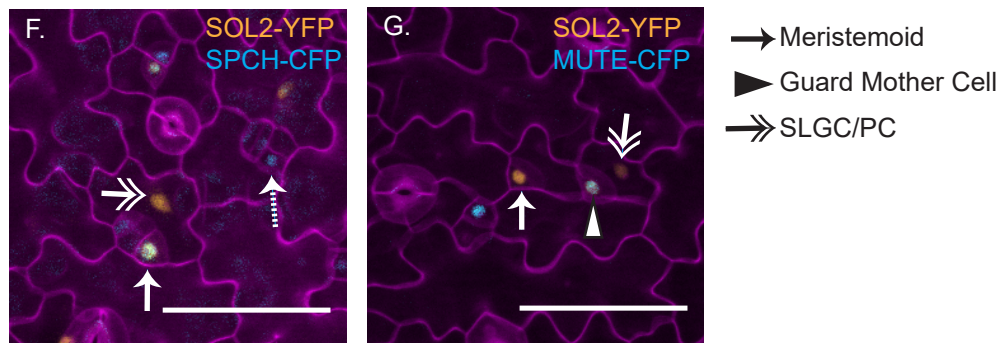

### SOL2-YFP, CDT1a-RFP

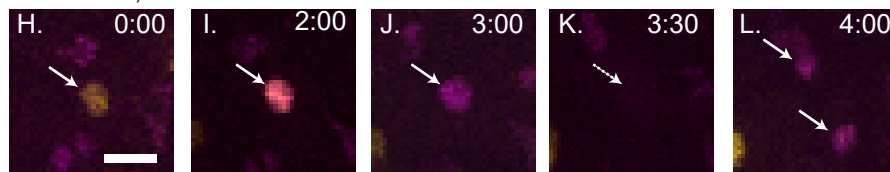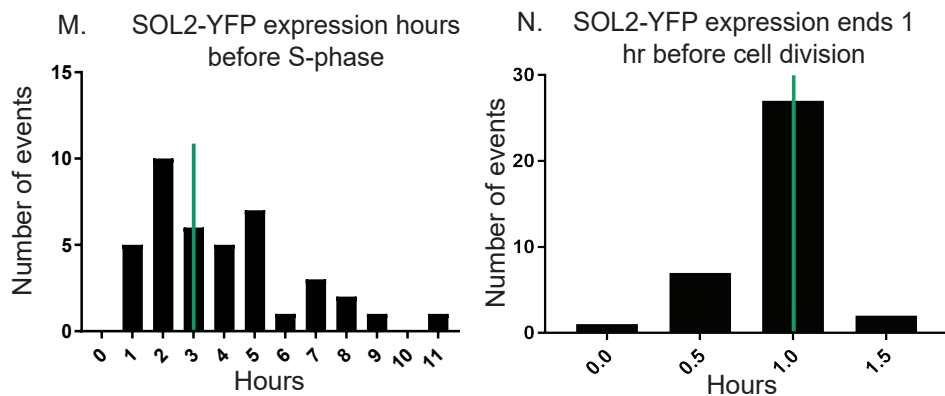

**Figure S1: Additional analysis of SOL1-YFP and SOL2-YFP, emphasizing connections to cell cycle**

(A-E) Time-lapse confocal imaging of SOL1pro:SOL1-YFP in wildtype background; plasma membrane visualized with ML1pro:RCI2A-mCherry, image captured every 30 min. SOL1 is expressed in two cells (A, yellow arrows). It turns off in the upper cell (B, dotted yellow arrow) then the lower cell (C, dotted yellow arrow). Each cell divides 2 hrs after SOL1-YFP expression is last seen (D, upper cell, white arrow) (E, lower cell, white arrow). (F-G) SOL2pro:SOL2-YFP is co-expressed with SPCHpro:SPCH-CFP in some (white arrow), but not all meristemoids (white dotted arrow) and with MUTEpro:MUTE-CFP in GMCs (arrowhead). SOL2 is also expressed in pavement cells and SLGCs (double arrows) that don't express SPCH or MUTE. (H-L) Representative images from time-lapse of SOL2pro:SOL2-YFP, HTR2pro:CDT1a(C3)-RFP. SOL2-YFP is visible first (H), then co-expressed with CDT1a-RFP (I). CDT1a-RFP is not visible for one frame (K) presumably during nuclear envelope breakdown, however, it persists into both daughter cells (L). (M) Quantification of length of time that YFP is detected before RFP is detected, green line indicates median at 3 hours, n=41. (N) Quantification of length of time after YFP cannot be seen before cell division, n=37, green line indicates median at 1 hour.

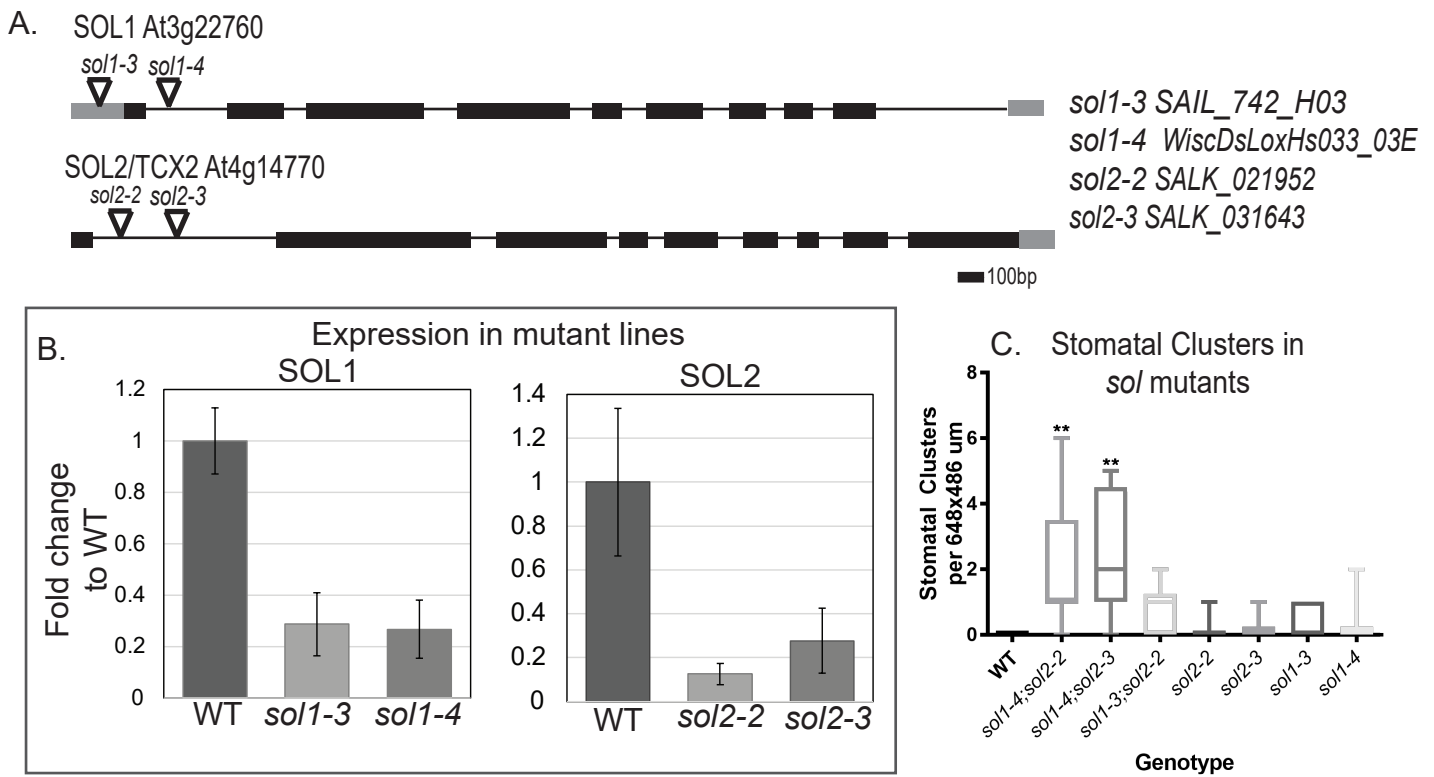

**Figure S2: Supporting information about alleles used for phenotypic analysis**

(A) Diagram of SOL1 and SOL2 genomic loci with position of T-DNA alleles indicated by triangles. (B) qRT-PCR analysis of expression levels of SOL1 and SOL2 transcripts in mutant seedlings at 9 dpv, levels are normalized to ACT2 as a reference gene, 3 biological replicates per genotype, error bars indicate standard deviation. (C) Quantification of stomatal clusters phenotypes in SOL single and double mutants, n = 9-10, significant difference compared to WT \*\*  $p < 0.01$ , Dunn's multiple comparison test.

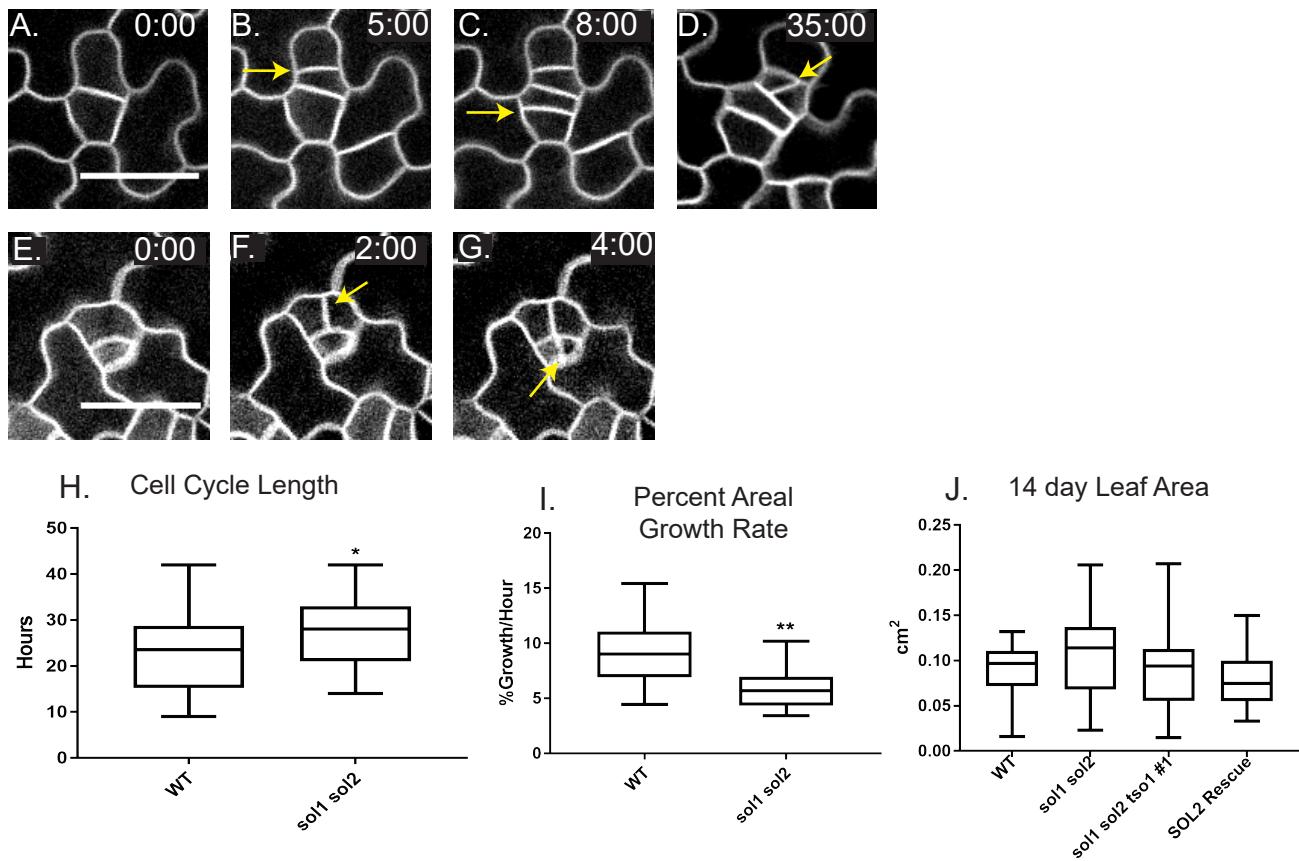

**Figure S3: Evidence that cell cycle times are increased, and post-division cell growth reduced in the stomatal lineage of *sol1 sol2* plants**

(A-G) Confocal time-lapse images of cells dividing in *sol1 sol2* as an example of data quantified in H-J, divisions indicated with yellow arrows. Scale bar 30  $\mu\text{m}$ . (H) Cell cycle length is increased in *sol1 sol2* mutants (WT n=24 cells scored, *sol1 sol2* n=22). (I) Percent growth per hour in small cells is reduced in *sol1 sol2* mutants (WT n=14 cells scored, *sol1 sol2* n=13). (J) Overall true leaf area at 14 dpf is not significantly different between WT and *sol1 sol2* mutants. Significance indicated: \* p<0.05, \*\* p<0.01, \*\*\* p<0.001, Mann Whitney test.

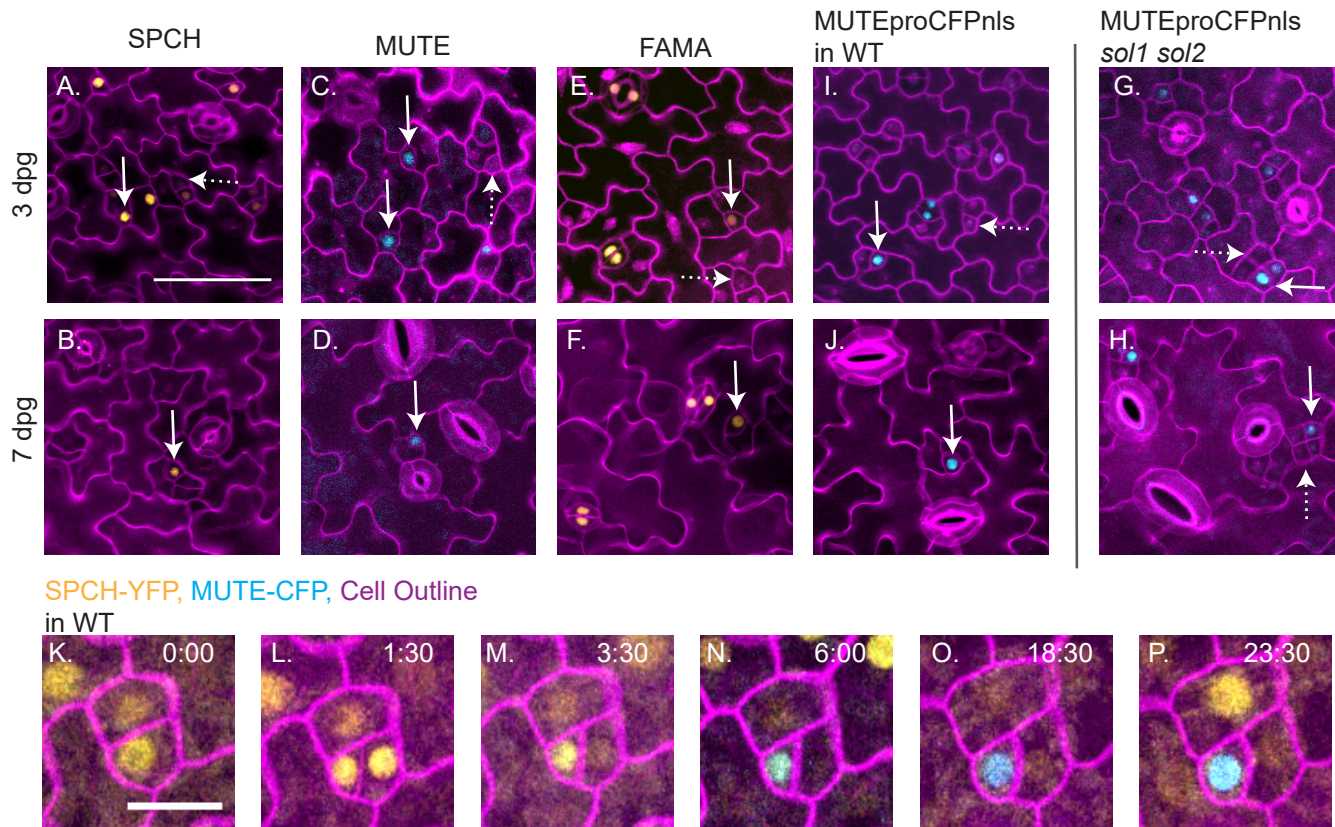

**Figure S4: Additional marker in *sol1 sol2* double mutants and marker expression in wildtype seedlings.**

(A-B) SPCHpro:SPCH-YFP in wildtype seedlings. (C-D) MUTEpro:MUTE-CFP in wildtype seedlings. (E-F) FAMApr:YFPnls in wildtype seedlings. (I-J) MUTEpro:CFPnls in wildtype seedlings. (G-H) MUTEpro:CFPnls in *sol1 sol2* seedlings. All images at same scale, scale bar in A, 50  $\mu$ m. (K-P) Selections from time-lapse of ML1pro:RCI2A-mCherry, SPCHpro:SPCH-YFP and MUTEpro:MUTE-CFP markers, all images same scale, scale marker in (K) 20  $\mu$ m. SPCH expressing cell divides in (L), begins to express MUTE in (N).



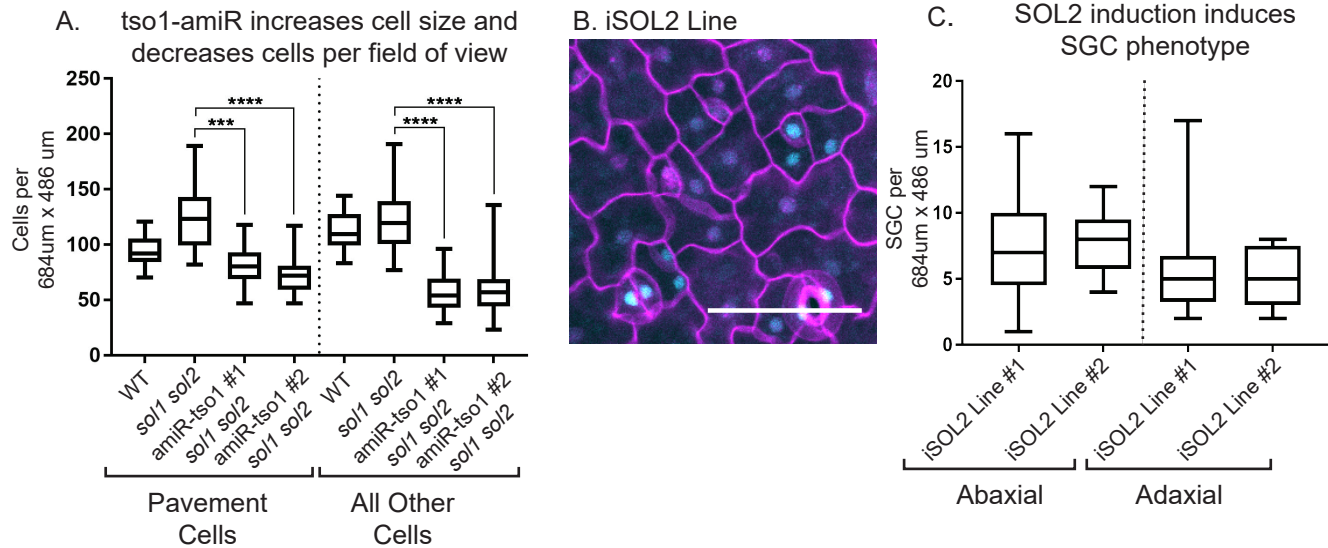

**Figure S5: Quantification of effects of *tso-1* amiRNA and SOL2-CFP overexpression on cell size and division phenotypes**

(A) Quantification of the changes in cell size and numbers in *tso1*-amiRNA *sol1 sol2* shows a decreased number of pavement cells and other cells (non-pavement cells, including guard cells) relative to *sol1 sol2*. (B) Expression of SOL2-CFP in 4dpg seedling throughout epidermis 24 hours after beta-estradiol induction. (C) Incidence of SGCs per field of view in two independent lines of induced seedlings. Seedlings induced at 3 dpd, screened for expression, then collected for analysis at 8 dpd, n = 9-13.

Significance indicated: \*\*\* p<0.001, \*\*\*\* p<0.0001, Dunn's multiple comparison test.

670 **Table S1: Primers used in this study**

|                                      | <b>Forward primer (5'-3')</b>                           | <b>Reverse Primer (5'-3')</b>                              |
|--------------------------------------|---------------------------------------------------------|------------------------------------------------------------|
| SOL1 genomic cloning                 | CACCATGGATACACCGGAAAAGAGTGAAAC                          | ATGGTGTGGAGTGAGAGAAGGAAAC                                  |
| SOL1pro cloning                      | GGGGACAACCTTTGTATAGAAAAGTT<br>GATCCCAAACATTTTATCCCATGGG | GGGGACTGCTTTTTTTGTACAAACTTGTTTC<br>TAACTACCAAAAACAATCTC    |
| SOL2 genomic cloning                 | CACCATGGATACCCCTCAGAAGAGTATTACTCAG                      | GTGTTGGGGAGTGAGAGAAGGAAAC                                  |
| SOL2pro cloning                      | GGGGACAACCTTTGTATAGAAAAGTTGTTACTCTT<br>GTCCCAACTCAGATCG | GGGGACTGCTTTTTTTGTACAAACTTGTTTCCA<br>ACACACAAACAAAAAAATCAC |
| UBQ10pro cloning                     | CATGGCGCGCCAGTCTAGCTCAACAGAGCTTTTAAC                    | GAGCTCCTGTTAATCAGAAAAACTCAGATTAA                           |
| SOL1 qPCR                            | CCAAGAAGAAAAGGCGTAAGTCC                                 | CACAGTAAAGCTTCAAACACTTGG                                   |
| SOL2 qPCR                            | ATCTTTGACTCACCTGATGCTTCTG                               | GTGAAACAGCCTCATAAGGAATCG                                   |
| ACTIN qPCR                           | TCTTCCGCTCTTTCTTTCCAAGC                                 | ACCATTGTCACACACGATTGGTTG                                   |
| WiscDsLox-<br>HS033_3E<br>Genotyping | CACACACACACCCACAAAAG                                    | TCTCTGTTGGATTTGGTTGG                                       |
| SAIL_742_H03<br>Genotyping           | TGATTAGCAATATTCAGCCAGC                                  | CTTTATGAGAAACCGCGTGAG                                      |
| SALK_021952<br>Genotyping            | AGATTGCAGACAAAGCAAAGC                                   | TGGAGAATCCTGCATTTTCAG                                      |
| SALK_031643<br>Genotyping            | AGATTGCAGACAAAGCAAAGC                                   | TGGAGAATCCTGCATTTTCAG                                      |
| SALK_074231<br>Genotyping            | GCTGGAATAGACCGTAGTATCAGC                                | GCTCATACCCCCTAGCATCTC                                      |

671
